# Supplementary material for: Activating transcription factor-2 (ATF2) is a key determinant of resistance to endocrine treatment in an in vitro model of breast cancer
Source: Breast Cancer Res. 2020 Nov 16;22:126. doi: 10.1186/s13058-020-01359-7 (PMC7667764; doi:10.1186/s13058-020-01359-7)
Supplement: Supplementary file 4 — Additional file 4: Supplementary file 2. siATF2 MvsT_DE Genes and Pathway analysis. [file 13058_2020_1359_MOESM4_ESM.xlsx]

## Sheet: siATF2.MvsT UpR genes
selUp	Symbol	MCF7_Si1vNT_lfc	MCF7_Si2vNT_lfc	TamR_Si1vNT_lfc	TamR_Si2vNT_lfc	MCF7_Si1vNT_p	MCF7_Si2vNT_p	Average MCF7_SvsNT	TamR_Si1vNT_p	TamR_Si2vNT_p	Average TAMR_SvsNT
ILMN_1707156	LRRFIP2	0.140135	0.0688047	2.25898	1.60508	0.0355373	0.296382	0.16596	5.04e-32	3.87e-26	1.935e-26
ILMN_1772329	LRRFIP2	0.189679	0.0850785	1.98266	1.51322	0.01456	0.263423	0.138992	2.47e-27	8.49e-23	4.24512e-23
ILMN_1656560	PARM1	0.115126	0.11659	1.57731	1.38446	0.144755	0.143309	0.144032	7.53e-23	1.03e-20	5.18765e-21
ILMN_1742444	UGT2B10	-0.0389836	-0.0621389	3.15734	1.2358	0.627929	0.444865	0.536397	3.91e-34	1.79e-18	8.95e-19
ILMN_1814769	UGT2B15	0.214214	0.108059	2.68741	1.20006	0.0142641	0.20795	0.111107	1.65e-30	2.59e-17	1.295e-17
ILMN_1752214	UGT2B17	-0.0363797	-0.0842958	2.98791	1.35969	0.714071	0.401752	0.557911	1.62e-29	9.73e-17	4.865e-17
ILMN_2137789	KLF4	0.15425	-0.0380467	1.92931	1.22214	0.103047	0.685706	0.394376	3.1e-23	4.11e-16	2.055e-16
ILMN_2334350	BTBD3	0.11277	-0.0694764	1.07711	0.895745	0.1069	0.320088	0.213494	9.13e-19	5.54e-16	2.77457e-16
ILMN_1808590	GUCY1A3	0.01451	0.0730088	1.50277	1.01555	0.853812	0.360528	0.60717	6.75e-22	7.41e-16	3.705e-16
ILMN_1755897	UGT2B7	0.16861	-0.12913	2.87396	1.01612	0.039559	0.114268	0.0769137	1.32e-32	1.14e-15	5.7e-16
ILMN_1810233	UGT2B11	0.0602384	-0.0786766	2.41294	0.954535	0.428047	0.306176	0.367111	1.72e-30	1.57e-15	7.85e-16
ILMN_3305938	SGK1	0.0614181	-0.15609	1.88917	1.04596	0.472526	0.0750513	0.273789	2.43e-24	3.78e-15	1.89e-15
ILMN_1763260	HIF1A	0.135277	0.0950934	1.43975	1.21998	0.18265	0.350502	0.266576	1.93e-17	5.24e-15	2.62965e-15
ILMN_3229324	SGK1	0.0197682	-0.217788	1.81065	1.03676	0.817854	0.0152806	0.416567	1.57e-23	6.26e-15	3.13e-15
ILMN_2379788	HIF1A	0.202188	0.0917234	1.30782	1.04909	0.0325979	0.325876	0.179237	2.58e-17	3.92e-14	1.96129e-14
ILMN_1721170	GREB1	0.10852	-0.187289	2.72559	1.2467	0.324853	0.0958269	0.21034	2.89e-26	4.22e-14	2.11e-14
ILMN_2131177	GUCY1A3	0.113889	0.00418955	1.12572	0.859511	0.15666	0.958306	0.557483	2.86e-17	1.99e-13	9.95143e-14
ILMN_2143566	SLC39A6	0.259769	0.183819	1.53249	1.06548	0.013287	0.0768581	0.0450726	2.71e-18	4.33e-13	2.16501e-13
ILMN_1681283	HIF1A	0.155001	0.0654064	1.09194	0.921745	0.0831606	0.461927	0.272544	2.3e-15	5.04e-13	2.5315e-13
ILMN_1794782	ABCG1	-0.125244	0.0112647	1.60198	0.728894	0.0822874	0.87464	0.478464	1.08e-24	8.79e-13	4.395e-13
ILMN_1880406	PTEN	-0.00252432	-0.175276	1.44478	0.738936	0.972036	0.0196678	0.495852	1.05e-22	9.87e-13	4.935e-13
ILMN_1791296	DPY19L1	0.0503767	0.0681419	0.675546	0.733179	0.450211	0.312752	0.381481	1.24e-12	1.12e-13	6.76e-13
ILMN_1682717	IER3	-0.193923	-0.00332125	1.134	0.788347	0.0177618	0.96677	0.492266	1.86e-17	2.26e-12	1.13001e-12
ILMN_1691436	BLVRA	-0.0498545	-0.0550097	0.978702	0.609464	0.43797	0.396657	0.417314	2.1e-18	8.81e-12	4.405e-12
ILMN_1655614	DSP	0.081664	0.00493431	0.818605	0.713743	0.283953	0.94848	0.616216	1.89e-13	1.14e-11	5.7945e-12
ILMN_2406035	LAMA3	-0.117355	0.194517	0.844391	1.1965	0.196298	0.0368239	0.116561	1.2e-11	2.61e-16	6.00013e-12
ILMN_2092077	PIP	0.23785	0.0416284	2.74588	0.828065	0.0101159	0.642536	0.326326	5.63e-30	1.55e-11	7.75e-12
ILMN_1748844	CNKSR3	-0.122912	-0.0252104	0.768624	0.62081	0.0849184	0.721544	0.403231	1.22e-13	6.38e-11	3.1961e-11
ILMN_2329927	ABCG1	-0.130852	0.0190514	1.36324	0.654395	0.0852421	0.800415	0.442829	3.47e-21	8.58e-11	4.29e-11
ILMN_1772869	ISM1	0.0409123	-0.0659085	0.701719	1.27177	0.626782	0.438544	0.532663	2.9e-10	3.17e-18	1.45e-10
ILMN_1713964	BTBD3	0.0931227	0.0215842	0.684449	0.597998	0.197724	0.765127	0.481425	7.17e-12	3.04e-10	1.55585e-10
ILMN_1705116	SLC22A23	0.0166011	-0.16066	1.27079	0.624602	0.82463	0.0383954	0.431513	5.04e-20	3.2e-10	1.6e-10
ILMN_1812461	WISP2	-0.109906	-0.128508	1.26956	0.617658	0.146073	0.0935084	0.119791	4.61e-20	3.91e-10	1.955e-10
ILMN_1715175	MET	-0.107883	-0.0826303	0.690037	0.596233	0.157334	0.280596	0.218965	2.44e-11	1.22e-09	6.222e-10
ILMN_1764709	MAFB	0.00466843	0.0283411	1.55253	0.633464	0.955763	0.738731	0.847247	2.38e-21	4.14e-09	2.07e-09
ILMN_1659099	ROCK2	0.12015	0.140446	0.579706	0.736827	0.130439	0.0811631	0.105801	5.89e-09	1.23e-11	2.95115e-09
ILMN_2234412	TLE3	0.165007	-0.0152586	0.497773	0.620309	0.020596	0.826434	0.423515	1.05e-08	4.22e-11	5.2711e-09
ILMN_1706015	FAM43A	-0.153031	-0.135498	0.538414	0.808249	0.0461208	0.0784649	0.0622929	1.15e-08	2.15e-13	5.75011e-09
ILMN_1662383	ZRANB2	-0.000536691	0.0742127	0.530555	0.452358	0.993288	0.252728	0.623008	3.24e-10	1.67e-08	8.512e-09
ILMN_1678049	FGB	-0.0100649	-0.153584	0.619182	1.68507	0.908833	0.088866	0.498849	1.84e-08	6.22e-22	9.2e-09
ILMN_1770548	CLASP2	0.187445	0.177302	0.496606	0.532596	0.0108171	0.016386	0.0136016	1.94e-08	4e-09	1.17e-08
ILMN_1812926	ANTXR2	0.00545388	-0.0208931	0.481977	0.564562	0.937281	0.765237	0.851259	2.47e-08	5.86e-10	1.2643e-08
ILMN_1814557	TRPS1	0.1105	0.116037	0.756967	0.542087	0.161261	0.145249	0.153255	4.61e-12	2.59e-08	1.29523e-08
ILMN_1699206	FHDC1	0.117395	0.0814248	0.893631	0.532824	0.13154	0.296368	0.213954	1.91e-14	2.71e-08	1.355e-08
ILMN_2415583	HS6ST2	-0.067255	0.144242	0.555907	0.630024	0.409439	0.0838713	0.246655	3.5e-08	1.98e-09	1.849e-08
ILMN_1698243	C1orf85	-0.147018	-0.166973	0.587191	0.467667	0.0381543	0.0204468	0.0293006	1.82e-10	4.68e-08	2.3491e-08
ILMN_2373177	PANK2	0.196757	0.0157629	0.642208	0.518824	0.0149125	0.841115	0.428014	4.08e-10	6.73e-08	3.3854e-08
ILMN_3199780	CAP1	0.143333	0.212888	0.556662	0.685955	0.0927654	0.0151934	0.0539794	6.76e-08	5.17e-10	3.40585e-08
ILMN_1654685	MCTP1	0.123045	0.06938	0.665798	0.473662	0.090122	0.33778	0.213951	1.43e-11	7.16e-08	3.58072e-08
ILMN_1764230	GNPTG	0.110718	0.141833	0.940085	0.469062	0.130354	0.0568151	0.0935844	4.96e-16	1.13e-07	5.65e-08
ILMN_1664012	CANT1	-0.169163	-0.0518917	0.71454	0.470141	0.0254198	0.484755	0.255087	4.3e-12	1.53e-07	7.65022e-08
ILMN_1784553	SDC2	-0.00100372	-0.154501	0.550984	0.489717	0.989545	0.050847	0.520196	1.14e-08	1.59e-07	8.52e-08
ILMN_1770678	CBX2	-0.0844235	-0.0997222	0.516891	0.693359	0.303027	0.229005	0.266016	1.76e-07	1.86e-10	8.8093e-08
ILMN_3229859	NA	0.105049	0.185155	0.578596	0.504343	0.190283	0.0249913	0.107637	8.38e-09	1.8e-07	9.419e-08
ILMN_1688071	NAT1	0.198909	0.170744	0.506295	0.523046	0.0146541	0.0360045	0.0253293	1.28e-07	6.73e-08	9.765e-08
ILMN_1683044	PPP1R2	0.0898822	0.0478084	0.45516	0.453325	0.201477	0.49762	0.349548	9.63e-08	1.1e-07	1.0315e-07
ILMN_3292990	NA	0.029131	0.0558456	0.817544	0.505162	0.718337	0.494051	0.606194	1.35e-12	2.45e-07	1.22501e-07
ILMN_1708427	KPNA3	0.130596	0.120385	0.50802	0.598699	0.116254	0.150285	0.13327	2.81e-07	8.27e-09	1.44635e-07
ILMN_1788689	PHIP	0.140569	0.0388838	0.480146	0.561001	0.0772027	0.621917	0.34956	3.31e-07	1.22e-08	1.716e-07
ILMN_1756982	CLIC1	0.0331509	0.0101221	0.401561	0.434917	0.612126	0.877879	0.745002	3.33e-07	6.66e-08	1.998e-07
ILMN_1701007	PON3	-0.0631365	-0.0367229	0.875969	0.481085	0.431752	0.64957	0.540661	1.3e-13	5.45e-07	2.725e-07
ILMN_1742230	BAZ1A	0.18165	-0.015375	0.391555	0.482236	0.00843334	0.817616	0.413025	6.88e-07	8.55e-09	3.48275e-07
ILMN_1759084	INTS8	0.0911785	-0.0215846	0.759636	0.618199	0.38479	0.837726	0.611258	8.81e-09	7.37e-07	3.72905e-07
ILMN_2221046	GM2A	0.0142834	-0.00757354	1.31184	0.498163	0.865821	0.929236	0.897528	1.21e-18	8.01e-07	4.005e-07
ILMN_1686573	DEFB1	0.117945	0.0939336	0.783895	0.427003	0.109251	0.203525	0.156388	1.9e-13	8.11e-07	4.055e-07
ILMN_2390338	UBE2E3	0.109695	-0.21766	0.519363	0.615935	0.218214	0.0182132	0.118214	7.92e-07	2.41e-08	4.0805e-07
ILMN_1695299	PDLIM3	-0.0450058	0.228241	0.565897	0.739983	0.640877	0.0229692	0.331923	8.21e-07	2.55e-09	4.11775e-07
ILMN_2284744	HNMT	0.03185	0.0323833	1.20315	0.37154	0.617725	0.615031	0.616378	1.01e-21	9.83e-07	4.915e-07
ILMN_1788462	AMD1	0.130338	-0.0505499	0.407115	0.387282	0.0516589	0.445507	0.248583	2.65e-07	7.4e-07	5.025e-07
ILMN_2160764	HBP1	-0.161448	0.169458	0.419813	0.424631	0.0253714	0.0203321	0.0228517	5.52e-07	4.62e-07	5.07e-07
ILMN_1687785	PPA2	-0.105527	7.45e-05	0.592218	0.424806	0.153561	0.999193	0.576377	6.2e-10	1.03e-06	5.1531e-07
ILMN_1733998	DHRS9	0.0681995	0.0869854	1.09176	0.432206	0.362373	0.250982	0.306677	9.05e-18	1.08e-06	5.4e-07
ILMN_1697420	TINF2	0.0679248	0.0906305	0.462865	0.458462	0.378743	0.246077	0.31241	4.99e-07	6.28e-07	5.635e-07
ILMN_1715273	PICALM	0.191831	0.0738102	0.68485	0.415844	0.0103663	0.311656	0.161011	7.91e-12	1.13e-06	5.65004e-07
ILMN_2177090	NBPF11	0.0918618	-0.0668874	0.858276	0.371854	0.16205	0.310213	0.236132	3.02e-16	1.37e-06	6.85e-07
ILMN_1769634	STRA13	-0.0914467	0.0246633	0.427015	0.510602	0.225506	0.743902	0.484704	1.39e-06	3.9e-08	7.145e-07
ILMN_1656501	DUSP5	0.0386485	-0.08959	0.387194	0.403471	0.564152	0.188972	0.376562	1.08e-06	5.12e-07	7.96e-07
ILMN_2053921	CAPZB	0.204315	-0.0371709	0.489226	0.510324	0.0195551	0.663634	0.341594	1.1e-06	5.14e-07	8.07e-07
ILMN_1806275	ADAT3	-0.058137	0.0462346	0.488419	0.395748	0.40747	0.513151	0.460311	2.21e-08	1.69e-06	8.5605e-07
ILMN_1764813	B3GALTL	-0.138184	-0.107773	0.466635	0.750067	0.100809	0.201686	0.151247	1.78e-06	3.53e-11	8.90018e-07
ILMN_1719696	PLD1	0.118669	0.167801	0.459442	0.569078	0.152742	0.0476151	0.100179	1.95e-06	2.69e-08	9.8845e-07
ILMN_2175114	KCNS3	-0.0330455	-0.171078	0.518675	0.574994	0.72486	0.0762738	0.400567	2.5e-06	3.75e-07	1.4375e-06
ILMN_1674399	ZNF143	0.155378	0.0432895	0.396528	0.485939	0.0369358	0.554827	0.295881	3.03e-06	5.85e-08	1.54425e-06
ILMN_1673586	SLC6A6	-0.00192603	-0.0347521	0.59035	0.413004	0.979652	0.648726	0.814189	1.56e-09	3.15e-06	1.57578e-06
ILMN_2352934	ASPH	0.000526116	0.0831166	0.428606	0.539729	0.994708	0.302175	0.648441	3.74e-06	4.21e-08	1.89105e-06
ILMN_1683271	TMSB4X	0.00992346	0.0596831	0.312115	0.526739	0.864595	0.312338	0.588467	4.24e-06	3.56e-11	2.12002e-06
ILMN_1785900	CXADR	-0.0382059	0.0897922	0.397505	0.551432	0.608544	0.236159	0.422352	4.63e-06	6.14e-09	2.31807e-06
ILMN_1803825	CXCL12	0.162142	0.075079	1.3175	0.485902	0.0807554	0.416046	0.248401	1.44e-17	4.89e-06	2.445e-06
ILMN_1669553	UBE2E3	0.115839	-0.0245547	0.357485	0.519499	0.0920402	0.718935	0.405488	5.38e-06	2.48e-09	2.69124e-06
ILMN_1801109	NAA16	0.173653	0.0619744	0.387746	0.430065	0.0212052	0.401685	0.211445	4.94e-06	7.93e-07	2.8665e-06
ILMN_3236637	PIP4K2A	-0.0201853	-0.00138035	0.351549	0.456513	0.764373	0.983783	0.874078	6.67e-06	4.52e-08	3.3576e-06
ILMN_1656136	STAU1	0.0235919	-0.0442351	0.504647	0.374571	0.742148	0.541584	0.641866	1.86e-08	6.85e-06	3.4343e-06
ILMN_1880983	LOC100509498	-0.206095	0.0909972	0.535268	0.42922	0.0159021	0.277537	0.14672	1.1e-07	7.34e-06	3.725e-06
ILMN_1704091	DGAT1	0.0916884	-0.00449937	0.689	0.36036	0.191391	0.948804	0.570098	2.49e-12	7.74e-06	3.87e-06
ILMN_2081398	KIF3B	0.190978	-0.0552598	0.56617	0.422673	0.0238425	0.504801	0.264322	2.82e-08	8.45e-06	4.2391e-06
ILMN_1796490	GRINA	0.15279	0.0509537	0.557709	0.414526	0.0628551	0.530945	0.2969	2.62e-08	8.61e-06	4.3181e-06
ILMN_1702503	ALDH3A1	0.0787752	-0.102697	0.479532	0.409056	0.322919	0.203316	0.263118	4.58e-07	8.38e-06	4.419e-06
ILMN_1911042	PIP4K2A	-0.0336807	0.0546664	0.315624	0.516326	0.584561	0.380505	0.482533	8.91e-06	2.68e-10	4.45513e-06
ILMN_2374362	FAM108B1	0.163701	0.078823	0.388722	0.481879	0.0352591	0.304925	0.170092	8.77e-06	1.72e-07	4.471e-06
ILMN_1768510	MAN2B2	0.189211	0.184579	0.741255	0.364312	0.0109201	0.0136287	0.0122744	6.56e-13	1.02e-05	5.1e-06
ILMN_3242448	SNORA11D	-0.0298341	-0.0622302	0.391866	0.470846	0.698265	0.424272	0.561268	1e-05	3.81e-07	5.1905e-06
ILMN_1795964	UBR1	0.157082	0.152909	0.67397	0.376986	0.038855	0.045887	0.042371	2.91e-11	1.06e-05	5.30001e-06
ILMN_2146372	KCTD6	0.0114945	0.0801477	0.350828	0.502426	0.869067	0.258273	0.56367	1.23e-05	1.15e-08	6.15575e-06
ILMN_1798354	PAPOLA	0.0397271	0.0231908	0.547841	0.353193	0.571557	0.7431	0.657328	1.56e-09	1.24e-05	6.20078e-06
ILMN_1766405	GOLM1	-0.0416991	0.151553	0.370291	0.419785	0.569605	0.0452557	0.30743	1.13e-05	1.34e-06	6.32e-06
ILMN_1717337	MARCH7	-0.0750006	-0.12766	0.437892	0.338059	0.270503	0.0665973	0.16855	1.14e-07	1.39e-05	7.007e-06
ILMN_1661172	NA	-0.205213	-0.0798577	0.411137	0.425923	0.0143539	0.329936	0.172145	1.02e-05	5.91e-06	8.055e-06
ILMN_1718303	PVRL2	0.18778	0.181531	0.71559	0.370039	0.0157661	0.0203595	0.0180628	7.75e-12	1.75e-05	8.75e-06
ILMN_1763657	CXXC4	0.0690679	0.0336324	0.81272	0.358798	0.348099	0.649325	0.498712	8.49e-14	1.93e-05	9.65e-06
ILMN_2113535	PCYOX1	-0.260102	0.200062	0.605167	0.522186	0.0178582	0.0670814	0.0424698	1.41e-06	1.8e-05	9.705e-06
ILMN_1783185	SOX21	0.104162	0.036881	0.370604	0.428138	0.173089	0.629193	0.401141	1.85e-05	1.69e-06	1.0095e-05
ILMN_1784287	TGFBR3	0.00371955	-0.0692752	0.763651	0.343755	0.957962	0.333322	0.645642	1.85e-13	2.12e-05	1.06e-05
ILMN_1767929	NA	0.0478779	0.0882673	0.558943	0.368143	0.528303	0.251889	0.390096	6.28e-09	2.19e-05	1.09531e-05
ILMN_1655720	CNNM4	0.215858	0.192048	0.505293	0.430388	0.0182098	0.0359498	0.0270798	1.34e-06	2.11e-05	1.122e-05
ILMN_1735156	SLC4A11	0.110078	-0.141858	0.438824	0.323337	0.104971	0.0403113	0.0726412	8.61e-08	2.34e-05	1.1743e-05
ILMN_1657470	YTHDF3	0.114465	0.0600609	0.327967	0.349503	0.0921233	0.375065	0.233594	1.81e-05	6.71e-06	1.2405e-05
ILMN_1683127	ZNF281	-0.030155	-0.0563078	0.379741	0.802432	0.703955	0.482846	0.5934	2.65e-05	1.49e-12	1.325e-05
ILMN_1686152	GGA2	-0.0380136	0.0699533	0.821742	0.375767	0.628561	0.379195	0.503878	5.02e-13	2.75e-05	1.375e-05
ILMN_1693771	ASPH	0.18217	0.096178	0.413426	0.444003	0.037893	0.268211	0.153052	2.27e-05	7.56e-06	1.513e-05
ILMN_1803977	GALNT1	0.0642204	-0.130108	0.419723	0.341089	0.37408	0.0784774	0.226278	9.21e-07	3.16e-05	1.62605e-05
ILMN_2395285	SNRNP35	0.207522	-0.188532	0.785858	0.376517	0.0125074	0.023548	0.0180277	3.26e-12	3.52e-05	1.76e-05
ILMN_1787415	SNX16	-0.0107929	-0.020971	0.469659	0.302138	0.867169	0.747497	0.807333	8.67e-09	3.82e-05	1.91043e-05
ILMN_1728742	C5orf4	0.135953	-0.0996667	1.05946	0.357787	0.0809555	0.200874	0.140915	6.2e-17	3.87e-05	1.935e-05
ILMN_2186678	C6orf211	0.187767	-0.176598	0.967622	0.452862	0.057733	0.0760719	0.0669024	1.98e-12	3.87e-05	1.935e-05
ILMN_1741391	RALGAPA1	0.158762	0.0554689	0.474829	0.337675	0.0325729	0.448111	0.240342	8.42e-08	3.91e-05	1.95921e-05
ILMN_1675048	IGF1R	0.038743	0.131677	0.393638	0.389409	0.630385	0.110064	0.370224	1.89e-05	2.31e-05	2.1e-05
ILMN_2285802	SEC14L1	0.095621	0.0271141	0.572952	0.303991	0.153761	0.685119	0.41944	1.14e-10	5.08e-05	2.54001e-05
ILMN_1660729	ATP6V1C2	-0.190425	-0.129196	0.786856	0.393163	0.0316132	0.142251	0.086932	2.59e-11	5.51e-05	2.755e-05
ILMN_1788268	NAPG	0.225459	0.0530915	0.58616	0.374481	0.00855617	0.522888	0.265722	1.38e-08	5.64e-05	2.82069e-05
ILMN_2240221	SYTL2	0.138088	-0.188415	0.484246	0.436329	0.149363	0.0536062	0.101485	9.25e-06	4.74e-05	2.8325e-05
ILMN_1680109	COL4A3BP	-0.167211	0.228008	0.524222	0.387671	0.055102	0.0108598	0.0329809	3.33e-07	5.81e-05	2.92165e-05
ILMN_1797596	SPRY4	0.102568	-0.074617	0.527562	0.455863	0.306338	0.459415	0.382876	5.3e-06	5.34e-05	2.935e-05
ILMN_1669931	TM9SF3	0.0796429	0.144043	0.373987	0.338481	0.287156	0.0601258	0.173641	1.23e-05	5.69e-05	3.46e-05
ILMN_2340565	ATP2C1	0.198013	0.0169219	0.524043	0.384755	0.0249883	0.844772	0.43488	3.69e-07	6.9e-05	3.46845e-05
ILMN_1753766	CAPN8	0.174275	-0.13826	0.869003	0.41062	0.0620816	0.139204	0.100643	8.57e-12	6.94e-05	3.47e-05
ILMN_1785191	TMEM14A	0.0504511	-0.119375	0.287129	0.357434	0.436947	0.0728333	0.25489	7.86e-05	2.61e-06	4.0605e-05
ILMN_1707506	YTHDC1	-0.0389843	0.0391238	0.306296	0.406173	0.573509	0.575554	0.574531	8.09e-05	8.49e-07	4.08745e-05
ILMN_1769118	SEPTIN9	0.0962192	0.173463	0.347778	0.336931	0.195195	0.0234831	0.109339	3.19e-05	5.22e-05	4.205e-05
ILMN_1807300	PKD2	0.156871	0.0766864	0.379374	0.326421	0.0369691	0.302325	0.169647	7.61e-06	7.67e-05	4.2155e-05
ILMN_2376502	RHOBTB1	-0.126108	0.112921	0.431939	0.358952	0.124011	0.170937	0.147474	4.51e-06	8.07e-05	4.2605e-05
ILMN_1682799	STAMBPL1	0.11315	-0.110748	0.424897	0.344983	0.151609	0.163935	0.157772	3.19e-06	8.45e-05	4.3845e-05
ILMN_1783598	CAB39L	0.0851908	-0.0894619	0.965348	0.330695	0.262835	0.244159	0.253497	9.19e-16	9.77e-05	4.885e-05
ILMN_2148847	AKIRIN2	0.0953232	0.0125572	0.303339	0.300926	0.15237	0.84995	0.50116	4.62e-05	5.35e-05	4.985e-05
ILMN_1705407	NOP56	0.0628215	0.203085	0.377445	0.37503	0.445949	0.0179187	0.231934	4.86e-05	5.5e-05	5.18e-05
ILMN_2092664	ADSS	-0.0180389	0.00655595	0.570887	0.308836	0.799188	0.926964	0.863076	7.38e-10	0.000104794	5.23974e-05
ILMN_1739624	UGT2B15	0.0230365	0.0627277	1.20341	0.381528	0.793134	0.480269	0.636701	9.01e-17	0.000108741	5.43705e-05
ILMN_1795704	KIAA0232	0.191185	0.134918	0.629717	0.37826	0.033543	0.131696	0.0826198	1.12e-08	0.000115925	5.79681e-05
ILMN_3236928	LAMTOR2	0.141974	0.147869	0.278017	0.263396	0.0210335	0.017456	0.0192447	3.86e-05	8.54e-05	6.2e-05
ILMN_1810591	PUS10	0.0851791	0.134003	0.414922	0.340303	0.284724	0.0985788	0.191652	6.17e-06	0.000123308	6.4739e-05
ILMN_1656186	SLC41A1	0.127852	0.093957	0.308462	0.378521	0.0813348	0.200367	0.140851	0.000126994	6.21e-06	6.6602e-05
ILMN_1722025	CPEB4	0.0480987	0.192088	0.323732	0.356487	0.52019	0.0139678	0.267079	0.000107462	2.84e-05	6.7931e-05
ILMN_1750100	TUBB8	0.250759	0.167028	0.389587	0.769452	0.00881104	0.0767561	0.0427836	0.000142781	2.77e-10	7.13906e-05
ILMN_1732398	SCGB2A1	0.0356743	-0.0569542	0.854897	0.320939	0.636841	0.455961	0.546401	4.5e-14	0.000143936	7.1968e-05
ILMN_1808768	ROCK1	0.167997	0.177469	0.467874	0.389909	0.071075	0.0592567	0.0651658	9.03e-06	0.00013506	7.2045e-05
ILMN_3246005	KDM5B	0.0052209	0.0370695	0.425989	0.445932	0.957171	0.70573	0.83145	9.42e-05	5.15e-05	7.285e-05
ILMN_1679725	PCYOX1	0.0237662	0.233506	0.50032	0.42244	0.810886	0.023907	0.417397	1.2e-05	0.000143254	7.7627e-05
ILMN_1740505	SGMS1	0.163669	0.0406562	0.408861	0.34829	0.050778	0.622996	0.336887	1.38e-05	0.000142879	7.83395e-05
ILMN_1714083	KLHL8	-0.160236	0.0642959	0.312372	0.476986	0.0354485	0.392166	0.213808	0.000157721	1.4e-07	7.89305e-05
ILMN_1715672	HPCAL1	-0.0759342	0.0426504	0.554208	0.341515	0.35201	0.603069	0.477539	3.7e-08	0.000165032	8.25345e-05
ILMN_1720181	CLSTN1	0.0971146	0.18729	0.339566	0.379212	0.229137	0.024586	0.126862	0.000144443	3.22e-05	8.83215e-05
ILMN_3251733	C19orf43	-0.0349944	0.0695002	0.277774	0.311854	0.594613	0.29725	0.445932	0.000149301	3.09e-05	9.01005e-05
ILMN_1746396	CTNNB1	0.131917	-0.0136078	0.349643	0.371478	0.111964	0.868935	0.49045	0.00012931	5.86e-05	9.3955e-05
ILMN_1737025	PLCL2	-0.0507303	0.0802797	0.349401	0.573003	0.547279	0.346751	0.447015	0.000188676	4.1e-08	9.43585e-05
ILMN_1772845	SNRNP35	0.109987	-0.194543	0.535141	0.321945	0.160659	0.0163087	0.0884839	2.86e-08	0.000193042	9.65353e-05
ILMN_1655444	SERF1A	0.142374	0.131688	0.265006	0.361501	0.0305798	0.0464601	0.03852	0.000195286	1.75e-06	9.8518e-05
ILMN_1719975	HOXC4	0.0653187	0.0852499	0.53639	0.362774	0.456776	0.336842	0.396809	3.55e-07	0.00019845	9.94025e-05
ILMN_1763184	RNF148	-0.00867692	0.103172	0.315603	0.436814	0.909477	0.18496	0.547218	0.000199513	1.39e-06	0.000100452
ILMN_1768248	FOXP1	0.204317	0.0674189	0.337294	0.354426	0.0132785	0.402303	0.207791	0.000142894	7.6e-05	0.000109447
ILMN_2396996	PPCS	0.0711515	0.132984	0.383118	0.330841	0.376449	0.105254	0.240851	2.68e-05	0.00020747	0.000117135
ILMN_1765204	ST13	-0.0289083	0.0187439	0.323239	0.284286	0.674431	0.787068	0.730749	3.48e-05	0.00020549	0.000120145
ILMN_2081465	APLP2	0.113003	0.165459	0.383646	0.362525	0.194547	0.0626159	0.128582	7.64e-05	0.000166642	0.000121521
ILMN_2189222	KLHL8	-0.00682893	0.227406	0.360878	0.616646	0.938676	0.0144085	0.476542	0.000246433	2.66e-08	0.00012323
ILMN_1800414	AE01	-0.0717265	-0.141642	1.01574	0.360058	0.41931	0.117975	0.268643	2.95e-14	0.000249895	0.000124948
ILMN_1687858	CALM2	-0.000543656	-0.1788	0.362424	0.293321	0.993984	0.0176221	0.505803	1.25e-05	0.000251806	0.000132153
ILMN_2327276	STAU1	0.0792999	-0.0545868	0.379124	0.264837	0.229457	0.410086	0.319771	1.05e-06	0.000266244	0.000133647
ILMN_1695246	KLHDC8B	0.146062	0.113693	0.5438	0.297332	0.0527041	0.131475	0.0920897	6.25e-09	0.000276977	0.000138492
ILMN_1744129	DTX2	0.125725	0.133796	0.414998	0.360172	0.160481	0.139327	0.149904	3.63e-05	0.000250573	0.000143436
ILMN_1666733	IL8	0.0832199	-0.0893084	0.520764	0.32606	0.308335	0.278972	0.293653	1.41e-07	0.000293226	0.000146683
ILMN_1680320	GBX2	-0.0231928	0.00447299	0.326402	0.709452	0.777066	0.956818	0.866942	0.00031217	1.17e-10	0.000156085
ILMN_2415179	CLSTN1	-0.13426	0.166144	0.28297	0.338473	0.0627068	0.0238463	0.0432766	0.000293545	2.71e-05	0.000160322
ILMN_2198239	HGD	0.0643837	-0.00365606	1.18129	0.363459	0.481514	0.968305	0.72491	5.97e-16	0.000321879	0.00016094
ILMN_2278729	EIF3B	-0.0498029	0.0976213	0.324077	0.307858	0.508097	0.201839	0.354968	0.000114619	0.000227316	0.000170968
ILMN_1708537	RBPJ	-0.135277	0.0423777	0.329182	0.496572	0.110715	0.615505	0.36311	0.000356312	6.75e-07	0.000178494
ILMN_1694491	CCNG1	-0.060587	-0.101651	0.35462	0.294329	0.415135	0.178455	0.296795	2.65e-05	0.00033231	0.000179405
ILMN_1765829	NUFIP2	0.233992	0.182447	0.365812	0.370615	0.0109639	0.0458747	0.0284193	0.000197344	0.000172303	0.000184824
ILMN_3251388	TMEM183A	-0.102856	0.11013	0.344204	0.431096	0.243166	0.215998	0.229582	0.000360479	1.75e-05	0.000188989
ILMN_1774689	TUSC3	0.177362	0.0634432	0.980051	0.40229	0.0897195	0.54125	0.315485	7.62e-12	0.000393761	0.000196881
ILMN_1695432	TPST2	0.149593	-0.0115291	0.278738	0.323669	0.038905	0.871367	0.455136	0.000347693	5.15e-05	0.000199596
ILMN_1769705	H3F3C	-0.054467	0.110836	0.380004	0.504577	0.576569	0.262839	0.419704	0.000400077	7.89e-06	0.000203983
ILMN_3248352	CCDC88C	-0.00837904	0.21518	0.334357	0.733976	0.922474	0.0167988	0.469636	0.000424053	1.8e-10	0.000212027
ILMN_2076463	SLC15A4	0.0121513	0.0740305	0.26621	0.449184	0.859552	0.288563	0.574057	0.00043211	9.83e-08	0.000216104
ILMN_1777913	CDK8	0.00959929	0.00143666	0.279247	0.395446	0.894426	0.984293	0.93936	0.000453458	3.17e-06	0.000228314
ILMN_1757350	CTNNB1	0.172507	0.0021796	0.310048	0.293034	0.0226111	0.976481	0.499546	0.000149317	0.000309054	0.000229186
ILMN_2140389	TMEM185A	0.173592	0.145332	0.416268	0.282378	0.0220388	0.0550561	0.0385474	1.58e-06	0.000484474	0.000243027
ILMN_1740407	CHSY3	-0.0402242	0.046817	0.296063	0.905242	0.604295	0.550185	0.57724	0.000510477	1.84e-14	0.000255239
ILMN_1679177	MARS2	0.113275	0.17795	0.307455	0.296049	0.132287	0.0214528	0.07687	0.000195527	0.000318727	0.000257127
ILMN_1660305	PDE12	0.170032	0.137778	0.262904	0.359864	0.0176084	0.0537066	0.0356575	0.000541717	7.42e-06	0.000274568
ILMN_1710408	LGR4	0.0962579	0.183475	0.281192	0.377955	0.198578	0.0178014	0.10819	0.000552215	1.03e-05	0.000281257
ILMN_1700888	ENPP1	-0.169143	0.0940207	0.439258	0.263376	0.0184945	0.184002	0.101248	1.86e-07	0.000563019	0.000281602
ILMN_1707553	FAM59A	0.164358	-0.0365466	0.274271	0.461361	0.0280054	0.618408	0.323207	0.000579339	1.81e-07	0.00028976
ILMN_1856851	NA	0.222945	0.186256	0.376715	0.364991	0.0195669	0.050842	0.0352044	0.000236228	0.000354688	0.000295458
ILMN_1727532	OLFML3	-0.0526963	-0.109471	0.856522	0.261935	0.449468	0.123553	0.28651	2.97e-15	0.000602669	0.000301335
ILMN_1690217	BFSP2	-0.0440822	0.0757576	0.320327	0.569607	0.605187	0.380052	0.49262	0.000604922	6.08e-08	0.000302491
ILMN_1745368	TMEM50A	-0.00163136	0.0671817	0.315953	0.284374	0.982397	0.370191	0.676294	0.000131471	0.000485996	0.000308734
ILMN_1723021	ICMT	-0.105045	0.188456	0.28121	0.370443	0.164686	0.0158762	0.0902811	0.000602471	1.61e-05	0.000309286
ILMN_1662578	C1GALT1	0.182579	-0.0170781	0.409694	0.336527	0.0456449	0.849417	0.447531	4.85e-05	0.000597107	0.000322804
ILMN_2180606	NAA50	0.0449551	0.127712	0.274407	0.371123	0.54204	0.0908937	0.316467	0.00066476	1.22e-05	0.00033848
ILMN_1656042	KIAA0319L	0.0447572	0.135679	0.641607	0.322043	0.605091	0.125075	0.365083	5.44e-09	0.000688354	0.00034418
ILMN_1701869	FBXO22	0.0375899	0.168722	0.425916	0.269703	0.604097	0.0250921	0.314594	7.9e-07	0.000689014	0.000344902
ILMN_3240316	TMSB4X	0.271692	0.143914	0.372985	0.658389	0.00948819	0.16071	0.0850991	0.000699868	9.48e-08	0.000349981
ILMN_1805645	TMTC2	0.044736	0.0541475	0.513019	0.242434	0.493703	0.412203	0.452953	1.31e-09	0.000702516	0.000351259
ILMN_1668634	FBXW7	0.0830916	0.151522	0.269393	0.381067	0.2558	0.0435094	0.149654	0.000697934	6.3e-06	0.000352117
ILMN_2337336	PVRL2	0.126718	0.173785	0.708124	0.27024	0.086903	0.0218186	0.0543608	4.24e-12	0.000707423	0.000353712
ILMN_3251691	POLR3G	-0.0702043	0.0362642	0.404009	0.259954	0.318696	0.608102	0.463399	1.13e-06	0.00071264	0.000356885
ILMN_2391912	SEC14L1	-0.0927442	0.0748462	0.525056	0.269672	0.206231	0.310331	0.258281	1.03e-08	0.000719447	0.000359729
ILMN_1708805	NCOA3	0.11644	-0.0134259	0.318403	0.275244	0.117052	0.855749	0.4864	0.000103663	0.000623097	0.00036338
ILMN_2358382	ZFYVE1	0.139915	0.111425	0.378034	0.250526	0.0437102	0.108142	0.0759258	2.07e-06	0.000737462	0.000369766
ILMN_3237291	SIRT7	-0.172465	-0.0216607	0.308058	0.428295	0.0436926	0.796915	0.420304	0.000738017	9.15e-06	0.000373583
ILMN_1728512	YWHAH	-0.0341798	-0.0871157	0.236949	0.541013	0.595175	0.183504	0.389339	0.000747378	2.45e-10	0.000373689
ILMN_1660871	NEK6	0.0118669	-0.0320971	0.257734	0.458846	0.865439	0.65	0.757719	0.000766986	9.48e-08	0.00038354
ILMN_2169856	C12orf43	0.141727	-0.235745	0.468566	0.317481	0.106023	0.00940532	0.0577143	3.43e-06	0.000789591	0.00039651
ILMN_2338116	TRAF5	0.0136029	0.0546997	0.270959	0.267623	0.843477	0.432958	0.638217	0.000365311	0.000432805	0.000399058
ILMN_1787628	NOP56	0.102783	0.0966718	0.345304	0.279307	0.179098	0.209769	0.194434	5.36e-05	0.00076195	0.000407775
ILMN_1726967	TWSG1	-0.0226158	0.105444	0.249899	0.435171	0.740954	0.131689	0.436322	0.000825852	1.74e-07	0.000413013
ILMN_1668834	RSF1	0.122153	0.134654	0.516234	0.35931	0.217498	0.178647	0.198072	5.92e-06	0.000831307	0.000418613
ILMN_1776094	PPCS	0.0229162	-0.00572143	0.419839	0.306585	0.784587	0.946051	0.865319	1.32e-05	0.000838002	0.000425601
ILMN_1778168	ELMO2	0.227261	-0.000121618	0.43195	0.322623	0.0132227	0.998911	0.506067	1.92e-05	0.000850306	0.000434753
ILMN_1809818	PRCC	0.0354648	-0.0426568	0.38845	0.28373	0.648708	0.587284	0.617996	1.38e-05	0.000860942	0.000437371
ILMN_1670377	ZNF20	0.0875922	0.0535262	0.247349	0.284091	0.195886	0.430468	0.313177	0.000747345	0.00015069	0.000449017
ILMN_1790162	ZC3H11A	0.164904	-0.067022	0.347904	0.238551	0.0156038	0.315536	0.16557	5.4e-06	0.000918391	0.000461895
ILMN_1757370	SMPD1	-0.130264	0.153707	0.26656	0.321952	0.0804528	0.0422756	0.0613642	0.000851186	9.12e-05	0.000471193
ILMN_1912737	HIPK2	0.16209	0.0420564	0.870455	0.300854	0.0575419	0.61807	0.337806	5.71e-13	0.000979663	0.000489832
ILMN_1779014	TSPYL1	-0.0682289	-0.0520678	0.504266	0.314568	0.436503	0.555559	0.496031	1.14e-06	0.000989234	0.000495187
ILMN_1728724	IL17RA	0.100519	0.0675748	0.337716	0.272497	0.188575	0.378229	0.283402	7.3e-05	0.000984927	0.000528963
ILMN_1661142	TMF1	0.113123	0.187094	0.305917	0.271282	0.133026	0.0160021	0.0745138	0.000209771	0.000851973	0.000530872
ILMN_1685722	EIF4A2	-0.186517	-0.128777	0.55636	0.24749	0.00975511	0.070836	0.0402956	7.85e-10	0.00106758	0.00053379
ILMN_1743137	PRRC2C	0.137698	0.104403	0.260511	0.353028	0.0645282	0.161036	0.112782	0.00105074	2.34e-05	0.000537069
ILMN_1752409	TNRC6A	0.176407	0.142977	0.278269	0.363479	0.0279249	0.0744115	0.0511682	0.00104725	4.02e-05	0.000543724
ILMN_2347917	EED	0.0721055	0.0887251	0.364136	0.294786	0.382766	0.288217	0.335492	8.17e-05	0.00103498	0.000558342
ILMN_1702279	KIF3B	0.103211	-0.0122891	0.368994	0.230669	0.116903	0.851033	0.483968	1.48e-06	0.00111929	0.000560384
ILMN_3240943	MECR	-0.0330904	0.19495	0.371484	0.441396	0.749259	0.0673462	0.408303	0.000995602	0.000138394	0.000566998
ILMN_3310391	MIR1204	0.0189382	0.0262429	0.298883	0.531933	0.822477	0.758046	0.790262	0.00114325	2.13e-07	0.000571731
ILMN_1658327	BAZ1A	0.144489	0.0897659	0.303334	0.391362	0.0976808	0.302823	0.200252	0.00116252	5.57e-05	0.00060911
ILMN_2291455	FAM102A	0.0544101	0.112561	0.292231	0.355308	0.509291	0.179653	0.344472	0.00110481	0.000117035	0.000610923
ILMN_2128668	FOXJ3	-0.0215765	0.13765	0.296948	0.251677	0.759834	0.0585094	0.409171	0.000159555	0.00108671	0.000623134
ILMN_2057220	HRSP12	-0.0457069	0.0490412	0.409411	0.43327	0.683159	0.664305	0.673732	0.000815604	0.000449062	0.000632333
ILMN_1736165	MLL3	-0.0749921	-0.0332032	0.691475	0.254964	0.304981	0.650919	0.47795	8.19e-12	0.00127984	0.00063992
ILMN_1711069	YPEL5	0.0283079	-0.105588	0.729927	0.243223	0.684148	0.137498	0.410823	4.64e-13	0.00132145	0.000660723
ILMN_1724211	GPRC5C	0.142345	0.0305738	0.267028	0.57981	0.068521	0.692559	0.38054	0.00133398	3.58e-09	0.00066699
ILMN_1714170	SPSB1	0.0875425	0.0544581	0.283767	0.484922	0.285442	0.508343	0.396893	0.00133711	6.5e-07	0.000668878
ILMN_1787378	ADD3	-0.00478293	0.0625688	0.666137	0.307927	0.956873	0.484514	0.720693	3.86e-09	0.00138715	0.000693578
ILMN_1785661	FAM108B1	0.106843	0.0783899	0.346715	0.418889	0.28293	0.433399	0.358164	0.0012549	0.000149964	0.000702432
ILMN_1798303	RAET1G	0.087955	0.0726383	0.310551	0.249549	0.221162	0.315184	0.268173	0.000100916	0.00130539	0.000703154
ILMN_1654010	AGPAT3	0.185173	-0.125658	0.334919	0.24302	0.0109174	0.0803342	0.0456258	2.63e-05	0.00140478	0.00071554
ILMN_1746917	LOC729859	-0.0839482	0.15025	0.355939	0.232347	0.215169	0.0310289	0.123099	5.13e-06	0.00146185	0.000733491
ILMN_1837935	TNPO1	0.0923325	0.175403	0.289678	0.231223	0.170493	0.012052	0.0912723	0.000103935	0.00142478	0.000764355
ILMN_1705685	MEIS1	0.0949023	-0.0764221	0.256007	0.45839	0.207325	0.31254	0.259933	0.00154778	3.5e-07	0.000774065
ILMN_1669046	FOXQ1	0.120804	0.1927	0.260853	1.90781	0.117142	0.0153088	0.0662256	0.00154814	2.15e-26	0.000774071
ILMN_1662328	CNNM3	0.107846	0.0865084	0.242362	0.452053	0.131925	0.228671	0.180298	0.00155508	1.54e-07	0.000777619
ILMN_1748027	PGAM5	0.0659118	0.0806042	0.383874	0.26106	0.387612	0.296059	0.341835	1.14e-05	0.00157	0.000790697
ILMN_1869087	NA	0.195723	0.160989	0.267025	0.370721	0.0157242	0.0463743	0.0310493	0.00163121	3.17e-05	0.000831455
ILMN_1679501	CSNK2A1	-0.13129	-0.0697945	0.26645	0.297035	0.0924623	0.369391	0.230927	0.0013837	0.000448431	0.000916064
ILMN_1679731	SLC15A4	0.0600293	0.0319371	0.2345	0.329324	0.388983	0.648585	0.518784	0.00180188	3.12e-05	0.000916537
ILMN_1770172	ZNF669	0.0162417	0.0414216	0.262807	0.308416	0.83311	0.594843	0.713977	0.00165723	0.000306169	0.000981701
ILMN_1669366	IFT88	0.183258	-0.0147336	0.348716	0.266073	0.0247337	0.853583	0.439158	8.69e-05	0.00193083	0.00100886
ILMN_1802457	MAX	0.09417	0.0877841	0.260381	0.331814	0.22894	0.265728	0.247334	0.00192837	0.000133881	0.00103113
ILMN_2361163	SSBP3	0.0714456	0.019582	0.296913	0.305672	0.39762	0.817539	0.607579	0.00118029	0.000897169	0.00103873
ILMN_1898682	PHIP	-0.0388856	-0.0673464	0.262312	0.353735	0.621246	0.397746	0.509496	0.0020287	6.73e-05	0.001048
ILMN_1781560	ST3GAL6	0.00962352	-0.0425176	0.265096	0.288168	0.900384	0.584261	0.742322	0.00148934	0.000645929	0.00106763
ILMN_2068104	TFPI2	0.0910645	0.238877	0.297055	0.376752	0.308679	0.0105358	0.159607	0.00200669	0.000150498	0.00107859
ILMN_1778662	DIP2A	-0.00360685	0.00719178	0.29497	0.273852	0.963706	0.928351	0.946028	0.000682211	0.0014954	0.00108881
ILMN_1769633	CTSO	-0.0933213	0.183628	0.251458	0.457484	0.223796	0.020559	0.122177	0.00220546	5.37e-07	0.001103
ILMN_1685415	HBP1	-0.13927	0.207576	0.308047	0.250918	0.0698371	0.00881633	0.0393267	0.000227761	0.00209984	0.0011638
ILMN_1669310	RHOT2	0.0751523	0.200842	0.319103	0.265382	0.348628	0.0160407	0.182335	0.000299086	0.00213233	0.00121571
ILMN_1788538	NCALD	0.145279	0.0738446	0.63203	0.267931	0.0821064	0.374546	0.228326	2.22e-09	0.00252136	0.00126068
ILMN_1831566	NA	-0.121849	0.206829	0.369476	0.285177	0.165423	0.0222439	0.0938337	0.000138618	0.00239818	0.0012684
ILMN_1761442	WDR24	-0.127566	0.182294	0.278537	0.292415	0.121719	0.030683	0.0762012	0.00157257	0.000991318	0.00128194
ILMN_2232712	MYO10	0.0291388	0.0101067	0.412528	0.270252	0.726074	0.904073	0.815074	1.53e-05	0.002625	0.00132015
ILMN_1778796	ADSS	-0.0254977	0.198709	0.372557	0.278165	0.765435	0.0253756	0.395405	0.000100248	0.00259097	0.00134561
ILMN_1697548	LPHN2	0.0910898	0.00787405	0.453056	0.251952	0.246386	0.920245	0.583315	9.97e-07	0.00276522	0.00138311
ILMN_1688892	LAMA3	0.14393	0.163405	0.242701	0.539762	0.0613903	0.0363143	0.0488523	0.00278292	1.31e-08	0.00139146
ILMN_1725320	SIGLEC1	-0.0199815	-0.0873335	0.2523	0.349701	0.798615	0.272409	0.535512	0.00278461	7.48e-05	0.0014297
ILMN_1666004	WASL	0.185504	0.138759	0.34534	0.226214	0.0113063	0.0560584	0.0336823	1.83e-05	0.00290875	0.00146353
ILMN_1893010	NA	-0.0378434	0.10308	0.263052	0.313539	0.641462	0.212462	0.426962	0.00264915	0.000462234	0.00155569
ILMN_3268048	LOC100130452	0.0131917	0.109817	0.593839	0.246405	0.864637	0.164471	0.514554	2.45e-09	0.0031494	0.0015747
ILMN_1743747	RUSC1	-0.0733285	0.0235657	0.803588	0.224699	0.301903	0.740833	0.521368	3.83e-14	0.00315507	0.00157754
ILMN_1689097	NAA20	0.102133	0.0615119	0.204606	0.276955	0.118159	0.346362	0.23226	0.00314945	0.000124348	0.0016369
ILMN_2293758	AKAP11	-0.0109169	0.0475939	0.276396	0.22507	0.876241	0.502117	0.689179	0.000355057	0.00293187	0.00164346
ILMN_2215639	TUBA3D	0.0317005	0.0671772	0.45782	0.229067	0.661483	0.359669	0.510576	1.86e-07	0.00329845	0.00164932
ILMN_1784299	C19orf43	0.0310753	0.129534	0.316986	0.327897	0.741876	0.178119	0.459998	0.00189758	0.00140268	0.00165013
ILMN_3196690	MORC2-AS1	0.0163865	0.153089	0.225401	0.507884	0.818745	0.0387017	0.428723	0.00336454	1.6e-08	0.00168228
ILMN_1716154	C5orf4	0.0609257	-0.0137988	0.432411	0.238351	0.421342	0.856231	0.638787	1.31e-06	0.00338403	0.00169267
ILMN_1764095	IQUB	-0.0583304	-0.0210128	0.274053	0.291772	0.483945	0.80215	0.643048	0.00226239	0.00127401	0.0017682
ILMN_1655011	SERF1A	0.164036	0.164729	0.191556	0.391891	0.0100782	0.0104091	0.0102437	0.00357589	1.53e-07	0.00178802
ILMN_1699728	BTD	0.0175777	0.029193	0.852907	0.227724	0.808932	0.690798	0.749865	1.47e-14	0.00361397	0.00180698
ILMN_1797813	SUZ12	0.151234	-0.00959585	0.237862	0.46756	0.0527245	0.900796	0.47676	0.00369888	3.74e-07	0.00184963
ILMN_1688629	ZNF274	0.118829	0.0959449	0.213946	0.327797	0.089731	0.171826	0.130778	0.00378335	2.96e-05	0.00190647
ILMN_1747546	TSPAN1	-0.188222	-0.108164	0.21663	0.372499	0.00967094	0.129889	0.0697802	0.00384105	4.81e-06	0.00192293
ILMN_1763638	BCAR3	-0.0591819	-0.0161974	0.220367	0.500504	0.40676	0.821269	0.614014	0.00385979	1.94e-08	0.0019299
ILMN_1691892	TAGLN2	0.213856	0.133212	0.242841	0.71249	0.0089061	0.0976115	0.0532588	0.00389495	3.17e-11	0.00194748
ILMN_3243055	NA	0.0337891	-0.0120027	0.338051	0.283089	0.705831	0.8942	0.800015	0.000575551	0.00332122	0.00194838
ILMN_2216265	LONP2	0.0492186	0.0348393	0.383306	0.233245	0.514796	0.647253	0.581025	1.03e-05	0.0040098	0.00201005
ILMN_2181883	C14orf129	-0.0304362	0.170706	0.254918	0.384352	0.712442	0.0454361	0.378939	0.00399158	4.13e-05	0.00201644
ILMN_1807633	HRSP12	0.19302	0.176747	0.235834	0.466993	0.0150237	0.0263812	0.0207025	0.00407471	4.08e-07	0.00203756
ILMN_1796337	CXCL17	-0.00699952	-0.070572	0.249819	0.35111	0.931045	0.38935	0.660198	0.00400346	0.0001102	0.00205683
ILMN_1773561	RAP2C	0.206546	0.0115173	1.23204	0.266834	0.0209656	0.89511	0.458038	2.49e-17	0.00414735	0.00207368
ILMN_3299074	NOX4	0.0170193	0.0618866	0.309891	0.265004	0.839896	0.467886	0.653891	0.000770355	0.00349235	0.00213135
ILMN_1693431	LACC1	0.0634896	0.155804	0.288095	0.247084	0.420562	0.0545397	0.237551	0.000793113	0.0034873	0.00214021
ILMN_2371470	C1orf124	0.049924	0.109537	0.268501	0.27052	0.540218	0.18659	0.363404	0.00224315	0.00213864	0.00219089
ILMN_1813197	SLITRK6	-0.204107	-0.159028	1.0752	0.271974	0.0259805	0.0818511	0.0539158	5.66e-15	0.00441181	0.0022059
ILMN_1687410	OSBPL11	0.114653	0.162169	0.250119	0.284222	0.153593	0.0480046	0.100799	0.00337452	0.00104413	0.00220933
ILMN_1721629	ZNF654	0.0790666	0.250571	0.496449	0.335486	0.472243	0.0279209	0.250082	6e-05	0.00440333	0.00223166
ILMN_2177732	RANBP6	0.108922	0.242027	0.322542	0.274364	0.219527	0.00890368	0.114216	0.000792884	0.00373591	0.0022644
ILMN_1696021	KPNA6	-0.0143581	-0.00957284	0.211755	0.216013	0.82469	0.883605	0.854148	0.00246116	0.0020965	0.00227883
ILMN_1659054	CHKB	0.104714	0.117997	0.586593	0.219541	0.15265	0.111273	0.131962	6.13e-10	0.00468307	0.00234154
ILMN_1744239	FEM1B	0.151324	0.150961	0.539101	0.229249	0.0510892	0.0536427	0.0523659	1.47e-08	0.00482271	0.00241136
ILMN_2126344	SEC16A	0.0431807	-0.0186579	0.626501	0.201575	0.518078	0.781507	0.649793	1.17e-11	0.00482952	0.00241476
ILMN_1717946	DGKE	0.16593	-0.0482735	0.249116	0.195348	0.0124815	0.455575	0.234028	0.000405948	0.00443588	0.00242091
ILMN_3309684	MIR153-1	-0.0894954	-0.137536	0.309467	0.247487	0.271881	0.0973775	0.184629	0.000500215	0.00438887	0.00244454
ILMN_1740752	AGPAT6	0.119916	0.181723	0.251117	0.236457	0.112172	0.0191641	0.0656679	0.00181252	0.0031802	0.00249636
ILMN_1775829	PERP	0.0655712	0.142986	0.690249	0.27819	0.479862	0.13096	0.305411	4.86e-09	0.00506608	0.00253304
ILMN_1687074	CDC14B	0.176703	-0.0846377	0.413182	0.256482	0.0435048	0.328557	0.186031	2.25e-05	0.00509038	0.00255644
ILMN_2387919	PRKAG2	0.0573983	-0.0279405	0.303456	0.208724	0.410065	0.690114	0.550089	9.67e-05	0.00504719	0.00257195
ILMN_3291578	LOC100131138	0.0501014	0.131231	0.279922	0.248608	0.531933	0.10935	0.320642	0.00128559	0.0038616	0.00257359
ILMN_1654385	ASB13	0.178197	-0.0244209	0.495041	0.21568	0.0167205	0.736512	0.376616	3.07e-08	0.00514923	0.00257463
ILMN_1700413	MAFF	-0.0130494	0.00693016	0.343423	0.259498	0.879438	0.936361	0.9079	0.000306991	0.00493345	0.00262022
ILMN_2374770	TAX1BP1	0.156365	-0.0821299	0.49603	0.232349	0.0494137	0.298055	0.173734	1.57e-07	0.00529055	0.00264536
ILMN_1691181	TMX1	0.14866	0.174781	0.205134	0.329249	0.0353324	0.0151061	0.0252193	0.00527585	2.73e-05	0.00265157
ILMN_1681760	ZC3H11A	0.0796282	0.0525678	0.251518	0.351561	0.345918	0.536176	0.441047	0.00515267	0.000177494	0.00266508
ILMN_1658526	RYK	0.00284634	-0.0136756	0.209713	0.196832	0.963657	0.828275	0.895966	0.00192315	0.00345062	0.00268689
ILMN_1887170	NA	0.086126	0.1627	0.307053	0.286739	0.347489	0.082561	0.215025	0.00186865	0.00350909	0.00268887
ILMN_2186369	NCOR1	0.0305586	0.0982832	0.308732	0.219556	0.677552	0.189226	0.433389	0.000161663	0.00528393	0.0027228
ILMN_1705224	TMEM110	0.230496	0.124664	0.262607	0.301025	0.00973269	0.153755	0.0817437	0.00420825	0.00124869	0.00272847
ILMN_1764690	NTS	-0.104251	-0.0581203	0.66284	0.270989	0.256367	0.528315	0.392341	8.83e-09	0.00552261	0.00276131
ILMN_3249825	MEF2A	-0.128967	-0.112031	0.279052	0.327878	0.167007	0.232753	0.19988	0.00473636	0.00112831	0.00293233
ILMN_3309759	VTRNA1-1	0.00138869	-0.0672744	0.2249	0.242011	0.984699	0.359606	0.672152	0.00381985	0.0020468	0.00293333
ILMN_3248811	SNORA27	0.0133288	0.0174337	0.476037	0.225512	0.86227	0.822082	0.842176	2.87e-07	0.00609735	0.00304882
ILMN_1695945	MEIS2	-0.0415913	-0.162961	0.663058	0.223548	0.586578	0.0393122	0.312945	1.03e-10	0.0062191	0.00310955
ILMN_1789955	PNRC1	-0.0828439	-0.0733586	0.41594	0.261231	0.355237	0.416611	0.385924	3.9e-05	0.00618221	0.0031106
ILMN_1745686	MFHAS1	0.00103962	0.114208	0.345434	0.256514	0.990485	0.198688	0.594587	0.000335736	0.00599343	0.00316458
ILMN_1897310	LETM1	0.145979	0.162468	0.31391	0.263414	0.103134	0.0731883	0.0881612	0.00107832	0.00530098	0.00318965
ILMN_1743352	TBCC	0.0786954	0.202352	0.23791	0.349583	0.337372	0.0175716	0.177472	0.0062966	0.000130309	0.00321345
ILMN_1780188	B3GALNT2	0.146361	0.189773	0.317971	0.221592	0.0588356	0.0165986	0.0377171	0.000166309	0.00628403	0.00322517
ILMN_2401933	ATP2B1	-0.0716534	-0.0704974	0.299882	0.194147	0.285175	0.29717	0.291173	6.45e-05	0.00641507	0.00323979
ILMN_2408877	MLL3	-0.00997521	0.133484	0.504596	0.246744	0.906323	0.123969	0.515146	6.33e-07	0.0065001	0.00325037
ILMN_1814526	ADD3	-0.146535	0.155949	0.631003	0.238316	0.0790375	0.0645026	0.0717701	2.21e-09	0.00650095	0.00325048
ILMN_2075065	FADS2	-0.0243365	0.0609313	0.430349	0.229324	0.758045	0.445984	0.602014	3.22e-06	0.00661282	0.00330802
ILMN_3296783	MPZL1	-0.023951	-0.11331	0.24136	0.259233	0.761259	0.159084	0.460172	0.00427974	0.00236231	0.00332102
ILMN_1693340	RAC3	0.0635393	-0.0667706	0.253662	0.204166	0.361327	0.34195	0.351638	0.000808184	0.00590396	0.00335607
ILMN_1725247	GTF2A1	-0.140635	0.0636096	0.200278	0.481304	0.0477207	0.365641	0.206681	0.00677643	2.71e-08	0.00338823
ILMN_1680770	UBQLN2	-0.0402243	-0.198561	0.213708	0.275716	0.58282	0.00978794	0.296304	0.00618495	0.000603709	0.00339433
ILMN_1691466	YES1	0.0364635	0.0906829	0.241651	0.23171	0.627141	0.234562	0.430851	0.00277701	0.00404956	0.00341329
ILMN_1655827	COPS2	-0.0789037	-0.059283	0.323119	0.262327	0.378138	0.510752	0.444445	0.000897908	0.00596686	0.00343239
ILMN_1695790	UBE2MP1	0.071687	0.170189	0.224742	0.270719	0.352127	0.0323793	0.192253	0.00604232	0.00120145	0.00362188
ILMN_1652413	UCN2	-0.0170375	-0.00479002	0.324763	0.217339	0.822222	0.950065	0.886144	0.000127109	0.0072804	0.00370375
ILMN_1802843	PRCC	0.1423	0.0920404	0.27897	0.184731	0.0319079	0.162066	0.0969871	0.000111383	0.00730966	0.00371052
ILMN_1761388	DAB2IP	0.103759	0.101352	0.29975	0.263282	0.246894	0.262044	0.254469	0.00184155	0.00568847	0.00376501
ILMN_1712748	C14orf129	-0.00757938	0.196186	0.2213	0.46499	0.922435	0.015958	0.469197	0.00761613	6.19e-07	0.00380837
ILMN_1695872	CDC42	0.197275	0.0676545	0.240969	0.264791	0.0181457	0.407812	0.212979	0.005237	0.00241339	0.00382519
ILMN_3236010	SCARNA11	-0.0920511	-0.0428357	0.810683	0.235919	0.270732	0.609397	0.440064	3.87e-12	0.00772842	0.00386421
ILMN_1706531	ABCC5	-0.054816	0.0351029	0.22448	0.352508	0.489873	0.660651	0.575262	0.00775457	7.8e-05	0.00391628
ILMN_1710427	VPS37B	-0.12269	0.141865	0.32053	0.201192	0.0887733	0.0523866	0.07058	6.03e-05	0.00778416	0.00392223
ILMN_2405297	NOTCH2	-0.0925203	-0.0299946	0.454872	0.216236	0.22995	0.697431	0.46369	6.3e-07	0.00799244	0.00399653
ILMN_1679383	AKIRIN1	0.175204	0.194766	0.214652	0.364556	0.0255056	0.0144554	0.0199805	0.0080343	2.71e-05	0.0040307
ILMN_2304289	GRIP1	-0.0541285	-0.208327	0.215332	0.294758	0.476497	0.00901546	0.242756	0.00765539	0.000428416	0.0040419
ILMN_2356672	EIF2B4	-0.0587871	-0.0327782	0.382718	0.191439	0.387917	0.632197	0.510057	1.71e-06	0.00811851	0.00406011
ILMN_1686957	SS18	0.156094	0.203246	0.268105	0.375334	0.104508	0.0381284	0.0713181	0.00779827	0.000339914	0.00406909
ILMN_1814465	UBE2G1	0.102103	0.0965894	0.290412	0.219058	0.188716	0.217239	0.202977	0.000577806	0.00760642	0.00409212
ILMN_1755414	C12orf36	0.0803163	0.113149	0.2745	0.254237	0.350118	0.19425	0.272184	0.00287993	0.00552594	0.00420294
ILMN_1795728	LOC646543	-0.0109057	-0.141708	0.245986	0.269122	0.89586	0.0973929	0.496627	0.00573347	0.00278309	0.00425828
ILMN_1656826	SH3RF1	0.146764	0.149889	0.209923	0.258266	0.0514647	0.0488081	0.0501364	0.00745167	0.00128697	0.00436932
ILMN_1808132	FAS	0.0689555	0.214741	0.262786	0.276549	0.435525	0.019509	0.227517	0.00529878	0.00356386	0.00443132
ILMN_1688683	NA	0.0329576	-0.0503401	0.24075	0.262965	0.687661	0.543299	0.61548	0.00593158	0.00293429	0.00443293
ILMN_1758292	NA	0.0130673	-0.0491873	0.261845	0.242709	0.873782	0.554209	0.713996	0.00309772	0.00585996	0.00447884
ILMN_1659749	DSP	0.113368	0.118092	0.207197	0.234861	0.118937	0.107785	0.113361	0.00670264	0.0024379	0.00457027
ILMN_1663858	ZNF286A	-0.0104961	-0.087399	0.254492	0.300858	0.906639	0.335815	0.621227	0.0076013	0.0019387	0.00477
ILMN_1773413	DOCK9	-0.00695796	-0.00213673	0.22548	0.27846	0.930978	0.978968	0.954973	0.00835229	0.0014477	0.0049
ILMN_1708159	PICK1	-0.00241858	0.0531918	0.230812	0.194238	0.971958	0.445156	0.708557	0.00193609	0.00814579	0.00504094
ILMN_3191030	LOC100129960	0.202016	0.0953424	0.319732	0.274785	0.0424829	0.333159	0.187821	0.00229461	0.00799672	0.00514567
ILMN_1652677	FAM89A	0.142829	0.101361	0.214051	0.224594	0.0566207	0.175192	0.115906	0.00622078	0.00433885	0.00527982
ILMN_1711712	GAS2L2	-0.122764	0.123623	0.286434	0.305192	0.219877	0.220766	0.220321	0.00676508	0.00419187	0.00547847
ILMN_1784566	LOC646908	-0.0575274	0.00371854	0.251391	0.221643	0.465282	0.962569	0.713925	0.00295344	0.00816128	0.00555736
ILMN_1716384	ATL2	-0.0673169	-0.115479	0.19467	0.205862	0.325437	0.0981733	0.211805	0.00728075	0.00482658	0.00605367
ILMN_1669215	SRPK2	0.177085	-0.0633487	0.234261	0.22316	0.0297097	0.429214	0.229462	0.00561111	0.00819913	0.00690512
ILMN_1875080	NA	-0.122899	-0.0788415	0.217523	0.213325	0.109527	0.304433	0.20698	0.00697221	0.00817358	0.0075729

## Sheet: siATF2.MvsT UpR Pathway Enrichm
STRING pathway enrichment analysis of genes upregulated in TAMRs after ATF2 silencing_KEGG
#term ID	term description	observed gene count	background gene count	false discovery rate	matching proteins in your network (IDs)	matching proteins in your network (labels)
hsa04520	Adherens junction	13	71	3.71e-07	ENSP00000217244,ENSP00000223023,ENSP00000252483,ENSP00000262367,ENSP00000265165,ENSP00000268035,ENSP00000304283,ENSP00000317272,ENSP00000340347,ENSP00000344456,ENSP00000358404,ENSP00000383118,ENSP00000462468	CDC42,CREBBP,CSNK2A1,CTNNB1,IGF1R,LEF1,MET,PVRL2,RAC3,TCF7,TCF7L2,WASL,YES1
hsa00053	Ascorbate and aldarate metabolism	6	27	0.0019	ENSP00000265403,ENSP00000304811,ENSP00000305221,ENSP00000320401,ENSP00000341045,ENSP00000387683	UGT2B10,UGT2B11,UGT2B15,UGT2B17,UGT2B4,UGT2B7
hsa00860	Porphyrin and chlorophyll metabolism	7	42	0.0019	ENSP00000265403,ENSP00000304811,ENSP00000305221,ENSP00000320401,ENSP00000341045,ENSP00000385757,ENSP00000387683	BLVRA,UGT2B10,UGT2B11,UGT2B15,UGT2B17,UGT2B4,UGT2B7
hsa00830	Retinol metabolism	8	62	0.0019	ENSP00000265403,ENSP00000304811,ENSP00000305221,ENSP00000320401,ENSP00000341045,ENSP00000387683,ENSP00000389241,ENSP00000482264	DGAT1,DHRS9,UGT2B10,UGT2B11,UGT2B15,UGT2B17,UGT2B4,UGT2B7
hsa05200	Pathways in cancer	24	515	0.0019	ENSP00000256646,ENSP00000261464,ENSP00000262320,ENSP00000262367,ENSP00000265165,ENSP00000268035,ENSP00000304283,ENSP00000306512,ENSP00000317272,ENSP00000317985,ENSP00000324532,ENSP00000340347,ENSP00000342793,ENSP00000344456,ENSP00000347979,ENSP00000349467,ENSP00000351490,ENSP00000358404,ENSP00000361021,ENSP00000361066,ENSP00000379140,ENSP00000382697,ENSP00000383118,ENSP00000437955	AXIN1,CALM1,CDC42,CREBBP,CTNNB1,CXCL12,CXCL8,FAS,HIF1A,IGF1R,LAMA3,LEF1,MAX,MET,NCOA3,NOTCH2,PLD1,PTEN,RAC3,ROCK1,ROCK2,TCF7,TCF7L2,TRAF5
hsa00040	Pentose and glucuronate interconversions	6	34	0.002	ENSP00000265403,ENSP00000304811,ENSP00000305221,ENSP00000320401,ENSP00000341045,ENSP00000387683	UGT2B10,UGT2B11,UGT2B15,UGT2B17,UGT2B4,UGT2B7
hsa05204	Chemical carcinogenesis	8	76	0.0029	ENSP00000265403,ENSP00000304811,ENSP00000305221,ENSP00000320401,ENSP00000341045,ENSP00000387683,ENSP00000411821,ENSP00000443194	ALDH3A1,NAT1,UGT2B10,UGT2B11,UGT2B15,UGT2B17,UGT2B4,UGT2B7
hsa00982	Drug metabolism - cytochrome P450	7	66	0.0067	ENSP00000265403,ENSP00000304811,ENSP00000305221,ENSP00000320401,ENSP00000341045,ENSP00000387683,ENSP00000411821	ALDH3A1,UGT2B10,UGT2B11,UGT2B15,UGT2B17,UGT2B4,UGT2B7
hsa04310	Wnt signaling pathway	10	143	0.0074	ENSP00000217244,ENSP00000262320,ENSP00000262367,ENSP00000265165,ENSP00000304283,ENSP00000317985,ENSP00000340347,ENSP00000344456,ENSP00000358404,ENSP00000378248	AXIN1,CREBBP,CSNK2A1,CTNNB1,CXXC4,LEF1,RAC3,ROCK2,TCF7,TCF7L2
hsa00980	Metabolism of xenobiotics by cytochrome P450	7	70	0.0075	ENSP00000265403,ENSP00000304811,ENSP00000305221,ENSP00000320401,ENSP00000341045,ENSP00000387683,ENSP00000411821	ALDH3A1,UGT2B10,UGT2B11,UGT2B15,UGT2B17,UGT2B4,UGT2B7
hsa05130	Pathogenic Escherichia coli infection	6	53	0.01	ENSP00000223023,ENSP00000317985,ENSP00000344456,ENSP00000382697,ENSP00000383118,ENSP00000456206	CDC42,CTNNB1,ROCK1,ROCK2,TUBB8,WASL
hsa00983	Drug metabolism - other enzymes	7	76	0.01	ENSP00000265403,ENSP00000304811,ENSP00000305221,ENSP00000320401,ENSP00000341045,ENSP00000387683,ENSP00000443194	NAT1,UGT2B10,UGT2B11,UGT2B15,UGT2B17,UGT2B4,UGT2B7
hsa00140	Steroid hormone biosynthesis	6	58	0.0131	ENSP00000265403,ENSP00000304811,ENSP00000305221,ENSP00000320401,ENSP00000341045,ENSP00000387683	UGT2B10,UGT2B11,UGT2B15,UGT2B17,UGT2B4,UGT2B7
hsa05213	Endometrial cancer	6	58	0.0131	ENSP00000262320,ENSP00000265165,ENSP00000340347,ENSP00000344456,ENSP00000358404,ENSP00000361021	AXIN1,CTNNB1,LEF1,PTEN,TCF7,TCF7L2
hsa05202	Transcriptional misregulation in cancer	10	169	0.0151	ENSP00000268035,ENSP00000268712,ENSP00000271526,ENSP00000272369,ENSP00000306512,ENSP00000317272,ENSP00000339835,ENSP00000350681,ENSP00000351490,ENSP00000414516	CXCL8,ELK4,H3F3C,IGF1R,MAX,MEIS1,MET,NCOR1,PRCC,SS18
hsa05131	Shigellosis	6	63	0.0158	ENSP00000223023,ENSP00000290246,ENSP00000306512,ENSP00000317985,ENSP00000382697,ENSP00000383118	CDC42,CXCL8,ELMO2,ROCK1,ROCK2,WASL
hsa05224	Breast cancer	9	147	0.0189	ENSP00000256646,ENSP00000262320,ENSP00000265165,ENSP00000268035,ENSP00000340347,ENSP00000344456,ENSP00000358404,ENSP00000361021,ENSP00000361066	AXIN1,CTNNB1,IGF1R,LEF1,NCOA3,NOTCH2,PTEN,TCF7,TCF7L2
hsa05215	Prostate cancer	7	97	0.025	ENSP00000262367,ENSP00000265165,ENSP00000268035,ENSP00000340347,ENSP00000344456,ENSP00000358404,ENSP00000361021	CREBBP,CTNNB1,IGF1R,LEF1,PTEN,TCF7,TCF7L2
hsa01100	Metabolic pathways	35	1250	0.0471	ENSP00000263702,ENSP00000265403,ENSP00000269195,ENSP00000272238,ENSP00000283871,ENSP00000284061,ENSP00000302629,ENSP00000304811,ENSP00000305221,ENSP00000313377,ENSP00000320401,ENSP00000324532,ENSP00000340409,ENSP00000341045,ENSP00000342793,ENSP00000354238,ENSP00000354829,ENSP00000355493,ENSP00000355559,ENSP00000357880,ENSP00000361642,ENSP00000380184,ENSP00000381140,ENSP00000382058,ENSP00000384400…	ADSS,AGPAT3,AGPAT6,ALDH3A1,AMD1,ATP6V1C2,B3GALNT2,BLVRA,BTD,C1GALT1,CHKB,CHSY3,DGAT1,DGKE,DHRS9,ENPP1,GALNT1,HGD,LAMA3,MECR,NAT1,PANK2,PLD1,POLR3G,PPCS,SGMS1,SMPD1,ST3GAL6,TUSC3,UGT2B10,UGT2B11,UGT2B15,UGT2B17,UGT2B4,UGT2B7
STRING pathway enrichment analysis of genes upregulated in TAMRs after ATF2 silencing_REACTOME
#term ID	term description	observed gene count	background gene count	false discovery rate	matching proteins in your network (IDs)	matching proteins in your network (labels)
HSA-156588	Glucuronidation	6	24	0.0073	ENSP00000265403,ENSP00000304811,ENSP00000305221,ENSP00000320401,ENSP00000341045,ENSP00000387683	UGT2B10,UGT2B11,UGT2B15,UGT2B17,UGT2B4,UGT2B7
HSA-162582	Signal Transduction	70	2605	0.0112	ENSP00000217244,ENSP00000223023,ENSP00000248975,ENSP00000256010,ENSP00000256646,ENSP00000259371,ENSP00000259874,ENSP00000262320,ENSP00000262367,ENSP00000263360,ENSP00000265165,ENSP00000268035,ENSP00000268712,ENSP00000272238,ENSP00000273610,ENSP00000284061,ENSP00000287878,ENSP00000290246,ENSP00000304283,ENSP00000306099,ENSP00000306361,ENSP00000306512,ENSP00000307046,ENSP00000308750,ENSP00000316578…	ATP6V1C2,AXIN1,CAB39L,CALM1,CBX2,CCDC88C,CDC14B,CDC42,CDK8,CLASP2,CREBBP,CSNK2A1,CTNNB1,CXCL12,CXCL8,CXXC4,DAB2IP,DGKE,DHRS9,DTX2,DUSP5,EED,ELMO2,FAS,FGA,FGB,FGG,FRK,GREB1,GTF2A1,HIF1A,IER3,IFT88,IGF1R,KCTD6,LAMA3,LAMTOR2,LEF1,LGR4,MEF2A,MET,NCOA3,NCOR1,NOTCH2,NR2E1,NTS,PIP4K2A,PRKAG2,PTEN,RAC3,RBPJ,RHOBTB1,RHOT2,ROCK1,ROCK2,RYK,SDC2,ST3GAL6,SUZ12,TAX1BP1,TCF7,TCF7L2,TLE3,TNRC6A,TUBB8,UCN2,WASL,X…
HSA-212436	Generic Transcription Pathway	37	1112	0.0112	ENSP00000217244,ENSP00000248975,ENSP00000256646,ENSP00000262189,ENSP00000262320,ENSP00000262367,ENSP00000263360,ENSP00000265165,ENSP00000268712,ENSP00000269394,ENSP00000287878,ENSP00000308750,ENSP00000316578,ENSP00000317272,ENSP00000335437,ENSP00000340347,ENSP00000342818,ENSP00000344456,ENSP00000344635,ENSP00000345206,ENSP00000347188,ENSP00000347979,ENSP00000349467,ENSP00000351490,ENSP00000356234…	AXIN1,CALM1,CBX2,CCNG1,CDK8,CREBBP,CSNK2A1,CTNNB1,EED,FAS,HIPK2,KCTD6,KDM5B,KMT2C,LAMTOR2,LEF1,MAX,MET,NCOR1,NOTCH2,NR2E1,PERP,PIP4K2A,PRKAG2,PTEN,RBPJ,SGK1,SUZ12,TCF7,TCF7L2,TNRC6A,YES1,YWHAH,ZNF20,ZNF274,ZNF669,ZNF750
HSA-3928662	EPHB-mediated forward signaling	6	41	0.0112	ENSP00000223023,ENSP00000307046,ENSP00000317985,ENSP00000382697,ENSP00000383118,ENSP00000462468	CDC42,ROCK1,ROCK2,SDC2,WASL,YES1
HSA-4411364	Binding of TCF/LEF:CTNNB1 to target gene promoters	4	8	0.0112	ENSP00000265165,ENSP00000340347,ENSP00000344456,ENSP00000358404	CTNNB1,LEF1,TCF7,TCF7L2
HSA-4641265	Repression of WNT target genes	4	12	0.0112	ENSP00000265165,ENSP00000340347,ENSP00000358404,ENSP00000452871	LEF1,TCF7,TCF7L2,TLE3
HSA-5617472	Activation of anterior HOX genes in hindbrain development during early embryogenesis	9	91	0.0112	ENSP00000262189,ENSP00000262367,ENSP00000263360,ENSP00000268712,ENSP00000272369,ENSP00000316578,ENSP00000361066,ENSP00000362410,ENSP00000399808	CREBBP,EED,HOXC4,KMT2C,MAFB,MEIS1,NCOA3,NCOR1,SUZ12
HSA-73857	RNA Polymerase II Transcription	42	1233	0.0112	ENSP00000216277,ENSP00000217244,ENSP00000248975,ENSP00000256646,ENSP00000262189,ENSP00000262320,ENSP00000262367,ENSP00000263360,ENSP00000265165,ENSP00000268712,ENSP00000269394,ENSP00000287878,ENSP00000308750,ENSP00000316578,ENSP00000317272,ENSP00000335437,ENSP00000340347,ENSP00000342818,ENSP00000344456,ENSP00000344635,ENSP00000345206,ENSP00000347188,ENSP00000347979,ENSP00000349467,ENSP00000351490…	AXIN1,CALM1,CBX2,CCNG1,CDK8,CREBBP,CSNK2A1,CTNNB1,EED,FAS,GTF2A1,HIPK2,INTS8,KCTD6,KDM5B,KMT2C,LAMTOR2,LEF1,MAX,MET,NCOR1,NOTCH2,NR2E1,PAPOLA,PERP,PIP4K2A,PRKAG2,PTEN,RBPJ,SGK1,SUZ12,TCF7,TCF7L2,TNRC6A,YES1,YWHAH,ZC3H11A,ZNF143,ZNF20,ZNF274,ZNF669,ZNF750
HSA-74160	Gene expression (Transcription)	44	1366	0.0112	ENSP00000216277,ENSP00000217244,ENSP00000248975,ENSP00000256646,ENSP00000262189,ENSP00000262320,ENSP00000262367,ENSP00000263360,ENSP00000265165,ENSP00000268712,ENSP00000269394,ENSP00000283131,ENSP00000287878,ENSP00000308750,ENSP00000316578,ENSP00000317272,ENSP00000335437,ENSP00000340347,ENSP00000342818,ENSP00000344456,ENSP00000344635,ENSP00000345206,ENSP00000347188,ENSP00000347979,ENSP00000349467…	AXIN1,CALM1,CBX2,CCNG1,CDK8,CREBBP,CSNK2A1,CTNNB1,EED,FAS,GTF2A1,HIPK2,INTS8,KCTD6,KDM5B,KMT2C,LAMTOR2,LEF1,MAX,MET,NCOR1,NOTCH2,NR2E1,PAPOLA,PERP,PIP4K2A,POLR3G,PRKAG2,PTEN,RBPJ,SGK1,SMARCA5,SUZ12,TCF7,TCF7L2,TNRC6A,YES1,YWHAH,ZC3H11A,ZNF143,ZNF20,ZNF274,ZNF669,ZNF750
HSA-8951430	RUNX3 regulates WNT signaling	4	8	0.0112	ENSP00000265165,ENSP00000340347,ENSP00000344456,ENSP00000358404	CTNNB1,LEF1,TCF7,TCF7L2
HSA-8986944	Transcriptional Regulation by MECP2	7	58	0.0112	ENSP00000268712,ENSP00000317272,ENSP00000349467,ENSP00000356832,ENSP00000361021,ENSP00000379144,ENSP00000385571	CALM1,HIPK2,MET,NCOR1,PTEN,SGK1,TNRC6A
HSA-195721	Signaling by WNT	15	293	0.0153	ENSP00000217244,ENSP00000262320,ENSP00000262367,ENSP00000265165,ENSP00000304283,ENSP00000340347,ENSP00000344456,ENSP00000349467,ENSP00000358404,ENSP00000368516,ENSP00000374507,ENSP00000378248,ENSP00000379144,ENSP00000452871,ENSP00000478721	AXIN1,CALM1,CCDC88C,CREBBP,CSNK2A1,CTNNB1,CXXC4,LEF1,LGR4,RAC3,RYK,TCF7,TCF7L2,TLE3,TNRC6A
HSA-201681	TCF dependent signaling in response to WNT	12	198	0.0153	ENSP00000217244,ENSP00000262320,ENSP00000262367,ENSP00000265165,ENSP00000340347,ENSP00000344456,ENSP00000358404,ENSP00000368516,ENSP00000374507,ENSP00000378248,ENSP00000452871,ENSP00000478721	AXIN1,CCDC88C,CREBBP,CSNK2A1,CTNNB1,CXXC4,LEF1,LGR4,RYK,TCF7,TCF7L2,TLE3
HSA-9018519	Estrogen-dependent gene expression	9	118	0.0163	ENSP00000262320,ENSP00000262367,ENSP00000347188,ENSP00000361066,ENSP00000370896,ENSP00000379140,ENSP00000379144,ENSP00000452454,ENSP00000452871	AXIN1,CREBBP,CXCL12,GREB1,GTF2A1,KCTD6,NCOA3,TLE3,TNRC6A
HSA-156580	Phase II - Conjugation of compounds	8	103	0.0275	ENSP00000265403,ENSP00000304811,ENSP00000305221,ENSP00000320401,ENSP00000339813,ENSP00000341045,ENSP00000387683,ENSP00000443194	NAT1,TPST2,UGT2B10,UGT2B11,UGT2B15,UGT2B17,UGT2B4,UGT2B7
HSA-168256	Immune System	52	1925	0.034	ENSP00000223023,ENSP00000252483,ENSP00000261667,ENSP00000262367,ENSP00000266771,ENSP00000272238,ENSP00000281708,ENSP00000284637,ENSP00000284878,ENSP00000290246,ENSP00000290650,ENSP00000297439,ENSP00000306099,ENSP00000306361,ENSP00000306512,ENSP00000307674,ENSP00000307833,ENSP00000309142,ENSP00000320936,ENSP00000326381,ENSP00000330221,ENSP00000336829,ENSP00000340274,ENSP00000341141,ENSP00000342793…	ASB13,ATP6V1C2,CALM1,CANT1,CAP1,CAPZB,CDC42,CREBBP,CTNNB1,CTSO,CXADR,CXCL8,DEFB1,DGAT1,DSP,EIF4A2,ELMO2,FBXO22,FBXW7,FGA,FGB,FGG,FRK,GM2A,HIF1A,IL17RA,KCTD6,KIF3B,KPNA3,LAMTOR2,MAGT1,MEF2A,MYO10,PDE12,PLD1,POLR3G,PTEN,PVRL2,RAP2C,ROCK1,SH3RF1,SIGLEC1,SLC15A4,SPSB1,TAX1BP1,TUBB8,UBE2E3,UBE2G1,UBR1,WASL,YES1,YPEL5
HSA-201722	Formation of the beta-catenin:TCF transactivating complex	6	60	0.034	ENSP00000262367,ENSP00000265165,ENSP00000340347,ENSP00000344456,ENSP00000358404,ENSP00000452871	CREBBP,CTNNB1,LEF1,TCF7,TCF7L2,TLE3
HSA-4086398	Ca2+ pathway	6	59	0.034	ENSP00000265165,ENSP00000340347,ENSP00000344456,ENSP00000349467,ENSP00000358404,ENSP00000379144	CALM1,CTNNB1,LEF1,TCF7,TCF7L2,TNRC6A
HSA-6807070	PTEN Regulation	9	135	0.034	ENSP00000217244,ENSP00000263360,ENSP00000308750,ENSP00000316578,ENSP00000357288,ENSP00000357979,ENSP00000361021,ENSP00000379144,ENSP00000476145	CBX2,CSNK2A1,EED,FRK,LAMTOR2,NR2E1,PTEN,SUZ12,TNRC6A
HSA-9006931	Signaling by Nuclear Receptors	10	167	0.034	ENSP00000262320,ENSP00000262367,ENSP00000347188,ENSP00000361066,ENSP00000370896,ENSP00000379140,ENSP00000379144,ENSP00000389241,ENSP00000452454,ENSP00000452871	AXIN1,CREBBP,CXCL12,DHRS9,GREB1,GTF2A1,KCTD6,NCOA3,TLE3,TNRC6A
HSA-3769402	Deactivation of the beta-catenin transactivating complex	5	41	0.035	ENSP00000265165,ENSP00000340347,ENSP00000344456,ENSP00000358404,ENSP00000452871	CTNNB1,LEF1,TCF7,TCF7L2,TLE3
HSA-9006925	Intracellular signaling by second messengers	13	274	0.0418	ENSP00000217244,ENSP00000259874,ENSP00000263360,ENSP00000308750,ENSP00000316578,ENSP00000317272,ENSP00000349467,ENSP00000357288,ENSP00000357979,ENSP00000361021,ENSP00000365757,ENSP00000379144,ENSP00000476145	CALM1,CBX2,CSNK2A1,EED,FRK,IER3,LAMTOR2,MET,NR2E1,PIP4K2A,PTEN,SUZ12,TNRC6A
HSA-1257604	PIP3 activates AKT signaling	12	242	0.0427	ENSP00000217244,ENSP00000259874,ENSP00000263360,ENSP00000308750,ENSP00000316578,ENSP00000317272,ENSP00000357288,ENSP00000357979,ENSP00000361021,ENSP00000365757,ENSP00000379144,ENSP00000476145	CBX2,CSNK2A1,EED,FRK,IER3,LAMTOR2,MET,NR2E1,PIP4K2A,PTEN,SUZ12,TNRC6A
HSA-2122947	NOTCH1 Intracellular Domain Regulates Transcription	5	45	0.0453	ENSP00000262367,ENSP00000268712,ENSP00000345206,ENSP00000370938,ENSP00000437955	CDK8,CREBBP,HIF1A,NCOR1,RBPJ
HSA-5223345	Miscellaneous transport and binding events	4	26	0.0453	ENSP00000291009,ENSP00000348381,ENSP00000354649,ENSP00000424544	ADD3,MAGT1,PIP,TUSC3

## Sheet: siATF2.MvsT DownR genes
selDown	Symbol	MCF7_Si1vNT_lfc	MCF7_Si2vNT_lfc	TamR_Si1vNT_lfc	TamR_Si2vNT_lfc	MCF7_Si1vNT_p	MCF7_Si2vNT_p	Average MCF7 SvsNT	TamR_Si1vNT_p	TamR_Si2vNT_p	Average TamR SvsNT
ILMN_1678323	AASS	-0.0168921	0.0652493	-2.82909	-2.89436	0.82646	0.403153	0.614807	5.97e-33	2.62e-33	4.295e-33
ILMN_2157219	AASS	0.0796946	0.0454687	-2.57304	-2.47313	0.305465	0.560563	0.433014	3.01e-31	1.59e-30	9.455e-31
ILMN_1670899	FBN2	-0.0783491	-0.0297568	-2.58156	-2.49495	0.342127	0.719383	0.530755	2.83e-30	1.19e-29	7.365e-30
ILMN_1724686	CLDN1	-0.176537	-0.195024	-2.04906	-1.78646	0.0374783	0.0234209	0.0304496	3.24e-26	6.8e-24	3.4162e-24
ILMN_1723035	OLR1	-0.050952	-0.0632586	-1.96474	-1.60444	0.533543	0.444163	0.488853	1.04e-25	2.48e-22	1.24052e-22
ILMN_2069286	CHRNA9	-0.147914	-0.161903	-1.51723	-2.53116	0.0635812	0.044935	0.0542581	3.44e-22	9.5e-31	1.72e-22
ILMN_3236653	NA	0.189619	-0.224827	-1.55542	-1.82728	0.042263	0.0180366	0.0301498	3.9e-20	1.12e-22	1.9556e-20
ILMN_2115125	CTGF	-0.0624342	0.210213	-2.19719	-1.45716	0.498442	0.0278979	0.26317	1.38e-25	6.36e-19	3.18e-19
ILMN_1796642	NCF2	-0.147823	-0.141017	-1.00761	-1.45382	0.0393196	0.0507403	0.0450299	1.58e-17	2.92e-23	7.90001e-18
ILMN_1737146	TRAM1	0.0411111	0.094023	-1.03529	-1.20765	0.580445	0.213726	0.397086	4.99e-17	2.49e-19	2.50745e-17
ILMN_1668592	GTF2A1L	-0.0895447	-0.0200005	-1.24184	-0.972771	0.258188	0.800909	0.529549	6.42e-19	2.85e-15	1.42532e-15
ILMN_1808117	C1QL4	0.0391595	0.00945095	-0.89386	-0.903209	0.602649	0.900746	0.751698	9.42e-15	7.25e-15	8.335e-15
ILMN_1680928	DNM3	0.0233022	0.189394	-1.04986	-1.26019	0.795721	0.0419708	0.418846	1.77e-14	4.64e-17	8.8732e-15
ILMN_1782141	GRHL3	-0.195121	-0.144594	-0.85169	-1.05875	0.0187096	0.0795259	0.0491178	3.3e-13	3.43e-16	1.65171e-13
ILMN_2212999	KIF5C	0.0358977	-0.0392358	-0.794305	-1.02243	0.643517	0.616226	0.629872	9.45e-13	3.45e-16	4.72672e-13
ILMN_1675808	TCHHL1	0.114567	0.00732702	-0.751104	-1.25466	0.133671	0.923219	0.528445	2.16e-12	1.07e-19	1.08e-12
ILMN_3308138	RNU4-2	0.170873	-0.0590836	-0.844917	-0.84428	0.0545158	0.501444	0.27798	4.43e-12	4.83e-12	4.63e-12
ILMN_1763390	ISL1	-0.030511	-0.158912	-0.81724	-0.959204	0.72454	0.0742407	0.39939	1.02e-11	9.45e-14	5.14725e-12
ILMN_3240220	NA	0.0775867	-0.117816	-1.05857	-1.3247	0.493278	0.304244	0.398761	1.27e-11	1.61e-14	6.35805e-12
ILMN_1759513	RND3	-0.188869	0.0927204	-1.1121	-0.647773	0.00945253	0.192613	0.101033	4.82e-19	1.79e-11	8.95e-12
ILMN_1668411	FHL2	0.0556515	-0.135279	-0.894392	-0.697474	0.46822	0.0851507	0.276685	1.65e-14	2.9e-11	1.45082e-11
ILMN_2355831	FHL2	0.0913575	-0.192101	-0.712055	-0.684885	0.242015	0.0175696	0.129792	2.17e-11	6.72e-11	4.445e-11
ILMN_1810725	FAM129A	-0.0699559	0.210804	-1.0755	-0.807952	0.45304	0.0289959	0.241018	2.29e-14	1.06e-10	5.30114e-11
ILMN_1806667	FRAS1	-0.185535	-0.0129493	-0.635949	-0.839141	0.0156266	0.862377	0.439002	1.38e-10	4.74e-14	6.90237e-11
ILMN_2314080	CTAGE5	-0.139426	-0.115246	-0.67638	-1.0794	0.08322	0.153406	0.118313	1.52e-10	1.09e-16	7.60001e-11
ILMN_1793410	SNTB1	-0.0809561	0.043996	-0.967839	-0.729495	0.349928	0.613296	0.481612	5.84e-14	2.15e-10	1.07529e-10
ILMN_2414027	CKLF	0.098672	-0.15237	-0.748354	-0.551103	0.137196	0.0253678	0.0812818	3.44e-14	2.53e-10	1.26517e-10
ILMN_1733390	LARP1B	-0.0407907	-0.104758	-0.887326	-0.691715	0.62385	0.21558	0.419715	2.75e-13	3.31e-10	1.65637e-10
ILMN_1784785	COPS7B	-0.0763584	-0.0831291	-0.744181	-0.551759	0.260721	0.225513	0.243117	9.87e-14	5.1e-10	2.55049e-10
ILMN_1764201	MAP2	0.188018	-0.109287	-0.665177	-1.13239	0.0254103	0.18886	0.107135	5.37e-10	6.28e-17	2.685e-10
ILMN_1673769	KCNG1	-0.159754	-0.188175	-0.743129	-0.686873	0.0632051	0.0313273	0.0472662	6.67e-11	5.63e-10	3.1485e-10
ILMN_1659627	NA	0.016298	-0.172241	-0.556973	-0.872649	0.815936	0.0184411	0.417189	1e-09	2.26e-15	5.00001e-10
ILMN_1669972	B7H6	-0.0946367	-0.0624838	-0.568721	-0.642013	0.19239	0.390858	0.291624	1.14e-09	5.09e-11	5.9545e-10
ILMN_1667966	FAM129A	-0.0397173	0.0845741	-1.05547	-0.833626	0.706274	0.427786	0.56703	1.84e-12	1.2e-09	6.0092e-10
ILMN_2219466	APOBEC3B	-0.140377	-0.0704578	-0.802588	-0.601835	0.0718508	0.363423	0.217637	4.66e-13	1.38e-09	6.90233e-10
ILMN_1794875	AGPAT9	0.127509	0.0902977	-0.716797	-0.528851	0.0673861	0.194624	0.131005	4.69e-13	2.08e-09	1.04023e-09
ILMN_2087941	ENTPD3	-0.117965	-0.139909	-0.691742	-0.611734	0.140394	0.0846233	0.112509	8.16e-11	2.05e-09	1.0658e-09
ILMN_1840316	NA	-0.0149199	0.154021	-0.694375	-0.508684	0.821436	0.0251235	0.42328	4.54e-13	2.41e-09	1.20523e-09
ILMN_1689001	CDK4	-0.166344	-0.0774668	-0.550603	-0.53146	0.018967	0.266176	0.142571	7.85e-10	2.01e-09	1.3975e-09
ILMN_1726783	RNASEH1	-0.193729	-0.0995444	-0.573222	-0.590364	0.0125007	0.190794	0.101647	2.4e-09	1.23e-09	1.815e-09
ILMN_2388484	MAP2	0.0979835	0.0393905	-0.619587	-0.868896	0.237836	0.635714	0.436775	3.91e-09	4.22e-13	1.95521e-09
ILMN_1666057	REEP2	-0.0163783	-0.135138	-0.597985	-0.600934	0.832818	0.0898108	0.461314	2.2e-09	2.06e-09	2.13e-09
ILMN_1750658	HAX1	-0.159189	-0.101922	-0.575824	-0.769647	0.0440577	0.194769	0.119413	4.74e-09	2.23e-12	2.37112e-09
ILMN_1785926	ZNF621	0.150109	-0.160154	-0.543032	-0.622212	0.044203	0.0338606	0.0390318	4.81e-09	1.66e-10	2.488e-09
ILMN_1684289	PNPO	0.0320283	0.0347463	-0.465343	-0.825616	0.616712	0.590556	0.603634	8.56e-09	6.98e-16	4.28e-09
ILMN_1676631	CCNO	0.124066	-0.102435	-0.83512	-0.53513	0.0982091	0.173661	0.135935	4.62e-14	9.94e-09	4.97002e-09
ILMN_2376723	CDKN2B	-0.0834724	-0.157479	-0.527534	-0.847345	0.260725	0.0389844	0.149855	1.26e-08	2.97e-14	6.30001e-09
ILMN_1692760	DPAGT1	0.0204782	0.0163061	-0.48948	-0.812573	0.764603	0.813152	0.788878	1.27e-08	1.05e-14	6.35001e-09
ILMN_1755937	ANXA2	0.122282	0.0206087	-0.672773	-0.514399	0.0966084	0.777834	0.437221	1.59e-11	1.58e-08	7.90795e-09
ILMN_1794473	PHF17	0.0297032	-0.0829258	-0.525813	-0.536222	0.68347	0.262427	0.472948	1.03e-08	6.88e-09	8.59e-09
ILMN_1741214	NXPH4	-0.160366	0.0696031	-0.548433	-0.577288	0.0422702	0.372535	0.207403	1.43e-08	4.53e-09	9.415e-09
ILMN_1682273	SHISA3	0.133511	0.0375084	-0.764101	-0.608772	0.127413	0.667152	0.397283	6.23e-11	1.91e-08	9.58115e-09
ILMN_2169439	ITGAV	0.0492485	-0.21436	-0.542528	-1.14631	0.527308	0.00879889	0.268054	2.27e-08	7.85e-18	1.135e-08
ILMN_2345015	PTGES2	-0.0601386	0.0120756	-0.521605	-0.581885	0.422543	0.872713	0.647628	2.25e-08	1.79e-09	1.2145e-08
ILMN_1806752	PLEKHH2	0.0269554	-0.111023	-0.500561	-0.515702	0.706977	0.129924	0.418451	2.22e-08	1.19e-08	1.705e-08
ILMN_1752810	LARP6	0.138105	0.17704	-1.39633	-0.515	0.0716312	0.0236784	0.0476548	1.83e-21	3.6e-08	1.8e-08
ILMN_1732171	NA	-0.15501	0.0565011	-0.559957	-0.503188	0.0391317	0.445889	0.242511	2.65e-09	3.36e-08	1.8125e-08
ILMN_1750167	PRR3	-0.0344269	-0.0874018	-0.665883	-0.841202	0.727462	0.382414	0.554938	4.84e-08	1.82e-10	2.4291e-08
ILMN_3303612	PABPC1L	-0.0860942	-0.234822	-0.827495	-1.35227	0.486133	0.0644567	0.275295	5.37e-08	1.3e-13	2.68501e-08
ILMN_1806651	PARP8	-0.0355296	-0.0749759	-0.514412	-1.01131	0.64448	0.336602	0.490541	5.81e-08	3.89e-16	2.905e-08
ILMN_1798659	CCDC28A	-0.188724	-0.134313	-0.469101	-0.558086	0.0102733	0.0648192	0.0375462	6.71e-08	1.25e-09	3.4175e-08
ILMN_1803005	MMACHC	-0.179833	-0.138362	-0.47063	-0.52761	0.0145921	0.0587104	0.0366512	7e-08	5.56e-09	3.778e-08
ILMN_1811984	KRT86	-0.171364	0.0614768	-0.58322	-0.692177	0.0589375	0.49368	0.276309	8.54e-08	1.75e-09	4.3575e-08
ILMN_1671489	PC	-0.15152	0.0375524	-0.489916	-0.618019	0.0481735	0.619619	0.333896	9.31e-08	4.16e-10	4.6758e-08
ILMN_1688580	CAMP	0.0544607	-0.0236654	-0.486258	-0.612715	0.466623	0.753254	0.609938	1e-07	4.69e-10	5.02345e-08
ILMN_2345016	PTGES2	-0.132986	0.014895	-0.449519	-0.454701	0.053585	0.826516	0.44005	6.07e-08	4.98e-08	5.525e-08
ILMN_1728501	CHRNA9	-0.0114485	-0.0708066	-0.525495	-0.804106	0.887636	0.388528	0.638082	1.12e-07	2.63e-12	5.60013e-08
ILMN_1713529	SEMA6A	0.0609195	0.0483715	-0.454724	-0.826481	0.391504	0.499365	0.445434	1.37e-07	1.86e-14	6.85e-08
ILMN_1730487	CALD1	0.00924362	0.129837	-0.794706	-0.523209	0.910117	0.121451	0.515784	4.7e-12	1.61e-07	8.05024e-08
ILMN_2345908	DDX11	-0.0874174	-0.0680858	-0.545193	-0.499783	0.265108	0.388212	0.32666	2.11e-08	1.46e-07	8.355e-08
ILMN_1679209	HSPA9	-0.0532133	0.0710183	-0.386971	-0.533412	0.390758	0.257872	0.324315	2.27e-07	1.25e-10	1.13563e-07
ILMN_3248511	FAM167A	-0.214215	0.04433	-0.534597	-0.649378	0.0159714	0.609039	0.312505	2.55e-07	3.6e-09	1.293e-07
ILMN_1744403	KCNIP3	-0.159194	-0.21756	-0.504387	-0.545458	0.053231	0.0101207	0.0316759	2.29e-07	4.59e-08	1.3745e-07
ILMN_1736995	C12orf66	-0.105285	-0.174921	-0.825448	-0.486545	0.184158	0.0316715	0.107915	4.32e-13	2.94e-07	1.47e-07
ILMN_1654398	RGL1	-0.129511	-0.00606552	-0.44988	-1.02989	0.0804353	0.934105	0.50727	2.96e-07	3.16e-17	1.48e-07
ILMN_1815035	DENND2C	-0.191784	-0.180829	-0.434421	-0.506108	0.00892663	0.0140524	0.0114895	3.04e-07	1.18e-08	1.579e-07
ILMN_1800993	CLUAP1	-0.174038	-0.135216	-0.478242	-0.429178	0.0153741	0.0583701	0.0368721	2.89e-08	3e-07	1.6445e-07
ILMN_1798472	LOC550112	0.00675804	-0.145545	-0.520398	-0.683357	0.936406	0.0941178	0.515262	3.41e-07	7.48e-10	1.70874e-07
ILMN_2186216	Golim4	-0.0586305	-0.0527539	-0.53969	-0.458778	0.433274	0.484352	0.458813	9.83e-09	3.45e-07	1.77415e-07
ILMN_1687768	NCOA7	-0.166784	0.0614811	-1.18948	-0.466199	0.0332722	0.425633	0.229453	9.88e-19	3.87e-07	1.935e-07
ILMN_1725338	CLDN23	0.0532233	0.0135562	-0.681827	-0.413936	0.437017	0.843918	0.640468	2.01e-12	4.57e-07	2.28501e-07
ILMN_1719763	WDR83	-0.0636952	0.132229	-0.463545	-0.457226	0.391506	0.0821441	0.236825	2.31e-07	3.19e-07	2.75e-07
ILMN_1677887	PMS2	-0.0573874	-0.0556567	-0.531173	-0.43051	0.42628	0.444308	0.435294	6.04e-09	5.85e-07	2.9552e-07
ILMN_2400219	SRI	-0.0332778	-0.206919	-0.488785	-0.467571	0.6656	0.0104546	0.338027	1.72e-07	4.4e-07	3.06e-07
ILMN_1809292	IMMP2L	-0.151265	-0.0991675	-0.416568	-0.687798	0.0355392	0.165399	0.100469	6.42e-07	3.56e-12	3.21002e-07
ILMN_1815610	SYT12	0.0946368	-0.126859	-0.418008	-0.589839	0.185398	0.0809072	0.133153	7.22e-07	3.16e-10	3.61158e-07
ILMN_2201678	FSTL1	0.0411929	-0.043412	-0.687837	-0.497315	0.624311	0.609021	0.616666	4.82e-10	7.33e-07	3.66741e-07
ILMN_1734254	ZNF770	-0.0997699	-0.14784	-0.387649	-0.54109	0.138055	0.0318841	0.0849696	9.12e-07	5.74e-10	4.56287e-07
ILMN_1775114	ENTPD3	-0.118685	-0.105241	-0.532964	-0.443765	0.122652	0.173475	0.148063	1.91e-08	9.03e-07	4.6105e-07
ILMN_1682428	HENMT1	-0.116412	-0.0913281	-0.66431	-0.385278	0.0830345	0.17464	0.128837	1.58e-12	9.43e-07	4.71501e-07
ILMN_1682863	C20orf151	0.100134	-0.20563	-0.471444	-0.688678	0.220424	0.0152222	0.117823	9.67e-07	1.91e-10	4.83595e-07
ILMN_2389876	TGFB1I1	-0.0798935	-0.00916776	-0.553187	-0.415249	0.265852	0.89855	0.582201	1.85e-09	9.94e-07	4.97925e-07
ILMN_1723198	CDKN2B	-0.0957422	-0.188532	-0.479598	-0.571311	0.251583	0.0285314	0.140057	1.08e-06	3.13e-08	5.5565e-07
ILMN_1655194	PHF17	-0.190148	-0.180985	-0.605382	-0.437964	0.0159132	0.0224388	0.019176	1e-09	1.25e-06	6.255e-07
ILMN_2083333	PMS2P5	-0.00104521	-0.103196	-0.406007	-0.382174	0.987286	0.124328	0.555807	2.94e-07	9.96e-07	6.45e-07
ILMN_2377199	SLC27A6	-0.125771	-0.0729812	-0.449719	-0.411159	0.083544	0.313729	0.198637	2.04e-07	1.23e-06	7.17e-07
ILMN_1665571	FLJ33630	0.0051244	-0.182077	-0.59897	-0.419439	0.94438	0.0176513	0.481016	5.38e-10	1.45e-06	7.25269e-07
ILMN_1892638	DKFZP564C152	-0.0878717	-0.123569	-0.500805	-0.413847	0.233472	0.0994788	0.166475	3.46e-08	1.7e-06	8.673e-07
ILMN_1672022	EPHA4	-0.148266	-0.057308	-0.419468	-0.75082	0.0516524	0.447027	0.24934	1.77e-06	1.64e-12	8.85001e-07
ILMN_1716400	FOXM1	-0.157891	-0.082848	-0.747833	-0.433614	0.0449248	0.288379	0.166652	4.3e-12	1.79e-06	8.95002e-07
ILMN_1804351	FZD7	0.0561801	0.0520108	-0.931064	-0.493927	0.522219	0.556937	0.539578	3.18e-13	1.82e-06	9.1e-07
ILMN_2287543	SHISA3	-0.0014467	-0.0271564	-0.570384	-0.491993	0.986795	0.758277	0.872536	9.88e-08	1.89e-06	9.944e-07
ILMN_1763884	TIMM16	0.0863108	0.0438235	-0.464726	-0.393671	0.222094	0.53617	0.379132	6.94e-08	1.94e-06	1.0047e-06
ILMN_2388874	GRHL3	-0.00631838	0.0778203	-0.443572	-0.458877	0.935002	0.32237	0.628686	1.32e-06	7.29e-07	1.0245e-06
ILMN_3244248	TMEM14B	-0.0258358	-0.00571726	-0.501871	-0.399512	0.717346	0.936669	0.827007	1.89e-08	2.05e-06	1.03445e-06
ILMN_1695893	NXPH4	-0.159295	-0.0863671	-0.433251	-0.59283	0.0465768	0.276636	0.161606	2.36e-06	3.4e-09	1.1817e-06
ILMN_1727606	C12orf59	-0.0690087	-0.0905684	-0.475642	-0.46078	0.400375	0.275436	0.337905	9.71e-07	1.82e-06	1.3955e-06
ILMN_2375651	SCNM1	-0.151714	-0.197283	-0.42962	-0.735191	0.0591662	0.0164443	0.0378052	3.1e-06	1.47e-11	1.55001e-06
ILMN_2041236	RAP1GAP2	-0.0759969	-0.0371861	-0.743086	-0.47799	0.392054	0.677047	0.534551	2.45e-10	3.84e-06	1.92012e-06
ILMN_2407482	ITPA	-0.147109	-0.169867	-0.477408	-0.37315	0.0397718	0.0195342	0.029653	3.47e-08	4.58e-06	2.30735e-06
ILMN_1663042	SDC4	0.0833647	-0.174733	-0.567183	-0.36721	0.230896	0.0154616	0.123179	4.34e-10	5.02e-06	2.51022e-06
ILMN_1668540	ZNHIT6	-0.124008	-0.156135	-0.31556	-0.426314	0.0436412	0.0129636	0.0283024	5.85e-06	1.56e-08	2.9328e-06
ILMN_1740345	THYN1	-0.0855172	-0.154022	-0.378591	-0.422516	0.235463	0.037534	0.136499	5.26e-06	7.55e-07	3.0075e-06
ILMN_1796682	PARP3	-0.0490535	-0.0550421	-0.443974	-0.506175	0.564292	0.521658	0.542975	6.57e-06	6.46e-07	3.608e-06
ILMN_1798256	UPP1	0.13745	0.137425	-0.999976	-0.413444	0.0895004	0.0923467	0.0909235	1.59e-15	7.49e-06	3.745e-06
ILMN_1714417	PSEN2	-0.133391	-0.114093	-0.39082	-0.365884	0.0600285	0.108771	0.0843995	1.8e-06	5.93e-06	3.865e-06
ILMN_2153466	FAM50B	-0.120161	-0.019353	-0.377455	-0.357744	0.0828507	0.778034	0.430442	2.34e-06	6.16e-06	4.25e-06
ILMN_1814657	TFAP4	-0.0970098	-0.180127	-0.455929	-0.382607	0.194818	0.019755	0.107286	3.28e-07	8.31e-06	4.319e-06
ILMN_1708619	SEH1L	-0.0379267	-0.0611963	-0.381758	-0.359233	0.581228	0.379095	0.480161	2.24e-06	6.69e-06	4.465e-06
ILMN_1684440	PXN	-0.144721	-0.0726926	-0.588881	-0.381165	0.0570597	0.335471	0.196265	1.14e-09	9.49e-06	4.74557e-06
ILMN_2157020	SNORD48	-0.192842	-0.113298	-0.452675	-0.401448	0.0170584	0.15531	0.0861843	1.04e-06	8.93e-06	4.985e-06
ILMN_1776858	DUS4L	-0.0864673	0.100649	-0.682235	-0.346126	0.210421	0.149767	0.180094	2.11e-12	1.16e-05	5.8e-06
ILMN_1774890	LAS1L	-0.116784	-0.151219	-0.504491	-0.381136	0.127765	0.0527151	0.0902401	6.12e-08	1.24e-05	6.2306e-06
ILMN_1657810	PPM1M	-0.0933854	-0.178774	-0.416922	-0.566898	0.265603	0.0382031	0.151903	1.33e-05	4.14e-08	6.6707e-06
ILMN_1662658	PUS1	-0.0621266	-0.088392	-0.66206	-0.382139	0.418998	0.256308	0.337653	1.16e-10	1.45e-05	7.25006e-06
ILMN_1798372	ANXA2P3	-0.0493838	0.0222601	-0.362025	-0.388505	0.491522	0.758065	0.624793	1.13e-05	3.61e-06	7.455e-06
ILMN_1757415	SELRC1	-0.104164	-0.163402	-0.638729	-0.342996	0.136893	0.0231607	0.0800267	1.86e-11	1.58e-05	7.90001e-06
ILMN_1810423	RPP40	0.177504	-0.153393	-0.340989	-0.523517	0.013108	0.031917	0.0225125	1.59e-05	3.28e-09	7.95164e-06
ILMN_1714428	FBXO17	-0.00913837	-0.0772341	-0.383705	-0.548863	0.906245	0.326677	0.616461	1.62e-05	1.77e-08	8.10885e-06
ILMN_1662961	GRHL3	-0.0482584	-0.0951576	-0.39634	-0.374121	0.516487	0.20808	0.362284	4.56e-06	1.23e-05	8.43e-06
ILMN_3272603	FAM60A	-0.107254	-0.185104	-0.398697	-0.409062	0.175472	0.0231922	0.0993323	1.01e-05	6.88e-06	8.49e-06
ILMN_1669831	C6orf192	-0.0412544	-0.177093	-0.362967	-0.934176	0.576052	0.0210846	0.298568	1.7e-05	1.28e-15	8.5e-06
ILMN_1761072	AIDA	-0.0394752	-0.119909	-0.403369	-0.649396	0.630125	0.151687	0.390906	1.71e-05	1.14e-09	8.55057e-06
ILMN_1774062	SLC25A5	0.0181743	-0.181826	-0.369419	-0.339823	0.789956	0.0111184	0.400537	3.59e-06	1.49e-05	9.245e-06
ILMN_1731157	MYOZ1	0.0571173	-0.0294967	-0.462336	-0.638049	0.546827	0.757403	0.652115	1.94e-05	5.09e-08	9.72545e-06
ILMN_1815326	CCDC68	0.0405773	-0.0451362	-0.42685	-0.415161	0.623156	0.588126	0.605641	7.74e-06	1.26e-05	1.017e-05
ILMN_1782618	C9orf16	-0.142566	0.100163	-0.356998	-0.554526	0.0572579	0.180594	0.118926	2.06e-05	3.71e-09	1.03019e-05
ILMN_1711928	ACSF2	-0.0960915	0.0546377	-0.472457	-0.367496	0.20694	0.474034	0.340487	2.3e-07	2.1e-05	1.0615e-05
ILMN_2386040	MYO19	-0.0379225	-0.071971	-0.477231	-0.356851	0.610856	0.340426	0.475641	1.42e-07	2.69e-05	1.3521e-05
ILMN_2392674	PRR3	-0.0944192	-0.0183505	-0.372284	-0.500221	0.230656	0.815874	0.523265	2.83e-05	1.52e-07	1.4226e-05
ILMN_1738992	MNDA	0.0399064	-0.100284	-0.461358	-0.51861	0.678563	0.304603	0.491583	2.59e-05	4.05e-06	1.4975e-05
ILMN_1790971	ANAPC1	-0.132745	-0.18673	-0.363497	-0.403704	0.0856692	0.0183902	0.0520297	2.62e-05	5.04e-06	1.562e-05
ILMN_3207933	ABCE1	0.0784867	0.0727244	-0.450595	-0.321482	0.251991	0.292207	0.272099	7.06e-08	3.3e-05	1.65353e-05
ILMN_1677080	IFT46	-0.126526	-0.0212952	-0.309409	-0.380907	0.0629255	0.751474	0.4072	4.16e-05	1.41e-06	2.1505e-05
ILMN_1718336	C7orf50	-0.0373069	0.0251562	-0.665071	-0.28147	0.546153	0.686329	0.616241	2.07e-13	5.54e-05	2.77e-05
ILMN_1698478	SNAPC2	-0.0534766	-0.199059	-0.345317	-0.460267	0.481998	0.0123213	0.24716	5.53e-05	4.54e-07	2.7877e-05
ILMN_1772506	ATP5I	-0.163072	-0.122052	-0.332393	-0.29197	0.0134288	0.0622915	0.0378601	6.46e-06	5e-05	2.823e-05
ILMN_1675542	NUS1	-0.146541	-0.136105	-0.345647	-0.402185	0.0583655	0.0804327	0.0693991	5.35e-05	5.23e-06	2.9365e-05
ILMN_1686464	SLCO4C1	-0.184894	-0.157157	-0.394267	-0.328388	0.0135657	0.0356016	0.0245836	3.06e-06	5.73e-05	3.018e-05
ILMN_2381138	SEH1L	-0.0181602	-0.00393405	-0.414469	-0.313116	0.792793	0.955006	0.873899	5.48e-07	6.13e-05	3.0924e-05
ILMN_1724700	RIOK3	-0.141597	-0.104506	-0.544117	-0.338025	0.0643976	0.171981	0.118189	9.29e-09	6.57e-05	3.28546e-05
ILMN_1764457	HEATR7B1	0.00544057	-0.0244679	-0.340662	-0.466852	0.942928	0.749795	0.846361	6.9e-05	3.58e-07	3.4679e-05
ILMN_1725204	MYL12B	-0.0890554	0.0804843	-0.340814	-0.33454	0.218313	0.269312	0.243812	2.95e-05	4.01e-05	3.48e-05
ILMN_1805192	ITPRIP	0.146298	-0.189205	-0.354656	-0.418827	0.0688842	0.0212767	0.0450805	6.53e-05	5.17e-06	3.5235e-05
ILMN_1700546	ELOVL6	-0.0915285	-0.148297	-0.419489	-0.331096	0.219699	0.0519669	0.135833	1.55e-06	7.16e-05	3.6575e-05
ILMN_1680781	C14orf135	-0.0781309	-0.0520154	-0.304702	-0.564065	0.25711	0.452621	0.354866	7.53e-05	4.28e-10	3.76502e-05
ILMN_1778240	GFOD1	-0.0332934	0.0666422	-0.408273	-0.321497	0.644519	0.361839	0.503179	1.61e-06	7.61e-05	3.8855e-05
ILMN_2237211	NXPH4	0.0300758	0.0652772	-0.333009	-0.383136	0.686571	0.387096	0.536834	7.13e-05	8.88e-06	4.009e-05
ILMN_1705032	SEH1L	-0.109462	-0.187182	-0.432895	-0.362324	0.182939	0.0268441	0.104891	4.83e-06	7.73e-05	4.1065e-05
ILMN_1714577	OGDHL	-0.0153229	-0.216302	-0.391502	-0.422651	0.859734	0.0169769	0.438356	6.23e-05	2.09e-05	4.16e-05
ILMN_1728802	SDCCAG8	-0.067992	-0.00875421	-0.322664	-0.48484	0.357206	0.905996	0.631601	9.13e-05	8.16e-08	4.56908e-05
ILMN_1810953	NA	0.00499608	-0.183948	-0.37623	-1.02248	0.953542	0.0384038	0.495973	9.27e-05	9.59e-15	4.635e-05
ILMN_1804597	DCAF17	0.00317952	-0.00174178	-0.344295	-0.342279	0.965904	0.981484	0.973694	4.38e-05	4.93e-05	4.655e-05
ILMN_1704291	CHCHD2	-0.030161	-0.152554	-0.477287	-0.327968	0.687137	0.0484889	0.367813	1.59e-07	9.66e-05	4.83795e-05
ILMN_2368535	FBXO17	0.00838534	-0.198868	-0.368688	-0.486876	0.921027	0.0239317	0.472479	0.000100993	1.25e-06	5.11215e-05
ILMN_1765332	TIMM10	0.0763815	-0.0287197	-0.525905	-0.35876	0.356181	0.729806	0.542994	1.55e-07	0.000105051	5.2603e-05
ILMN_2111918	C14orf135	-0.030503	-0.01098	-0.304908	-0.456518	0.665252	0.877204	0.771228	0.000110505	1.19e-07	5.5312e-05
ILMN_1703441	ZNF593	0.118584	0.0436764	-0.37362	-0.308493	0.0995849	0.541939	0.320762	5.64e-06	0.000105076	5.5358e-05
ILMN_1708151	LAGE3	-0.171252	-0.0817227	-0.797558	-0.27785	0.0102656	0.210417	0.110342	2.19e-15	0.000111171	5.55855e-05
ILMN_3237241	FAM32A	0.180944	-0.0715949	-0.349506	-0.31889	0.0158089	0.329369	0.172589	2.31e-05	8.94e-05	5.625e-05
ILMN_1694780	GCHFR	-0.0605276	0.147028	-0.696282	-0.30342	0.390646	0.0429412	0.216794	2.5e-12	0.000116419	5.82095e-05
ILMN_2112049	DNLZ	0.0818796	0.0903728	-0.403155	-0.28565	0.220948	0.181359	0.201153	4.16e-07	0.000121216	6.0816e-05
ILMN_1778136	ZMYND15	0.0920928	-0.0625908	-0.340222	-0.724361	0.249146	0.43556	0.342353	0.000124032	2.75e-11	6.2016e-05
ILMN_1806937	BABAM1	0.011197	0.0215291	-0.276651	-0.463186	0.862517	0.741517	0.802017	0.000128977	1.32e-08	6.44951e-05
ILMN_2046611	MCOLN3	0.0338529	-0.0789605	-0.313555	-0.590297	0.645779	0.290667	0.468223	0.000135724	8.56e-10	6.78624e-05
ILMN_1786353	CNGA1	-0.0491761	0.119102	-0.286549	-1.05814	0.466373	0.084995	0.275684	0.000137643	8.33e-19	6.88215e-05
ILMN_1698100	ANXA2P1	0.0672948	0.0433678	-0.379048	-0.418761	0.44404	0.624206	0.534123	0.000111633	2.82e-05	6.99165e-05
ILMN_3307025	ZDHHC4	-0.155767	0.031192	-0.503994	-0.298306	0.0306714	0.659242	0.344956	1.13e-08	0.000140937	7.04742e-05
ILMN_1683160	MECR	-0.122142	-0.0882989	-0.346274	-0.391773	0.134645	0.280588	0.207616	0.000121139	2.16e-05	7.13695e-05
ILMN_1689704	TMEM5	0.00130463	-0.0909767	-0.322228	-0.308866	0.985195	0.204116	0.594655	5.05e-05	9.38e-05	7.215e-05
ILMN_2072091	HNRNPUL2	-0.157735	0.114754	-0.531696	-0.299975	0.030134	0.11301	0.0715719	3.96e-09	0.000147546	7.3775e-05
ILMN_1838320	ONECUT2	-0.0858446	0.176463	-0.316844	-0.312937	0.227572	0.0166659	0.122119	6.68e-05	8.17e-05	7.425e-05
ILMN_1741331	MUDENG	-0.108021	-0.040233	-0.283323	-0.642527	0.116421	0.557108	0.336765	0.000174238	9.81e-12	8.7119e-05
ILMN_1702198	HMGN1	0.134372	-0.0438209	-0.469007	-0.343362	0.106666	0.596833	0.35175	1.34e-06	0.0001748	8.807e-05
ILMN_1743219	CA11	-0.149621	-0.199295	-0.358019	-0.731423	0.0870589	0.0257209	0.0563899	0.000180599	1.85e-10	9.02996e-05
ILMN_2144162	SGK494	0.0247668	-0.0840137	-0.323506	-0.386971	0.748465	0.284081	0.516273	0.000168755	1.35e-05	9.11275e-05
ILMN_1785324	MTHFD1	-0.098826	-0.148165	-0.390142	-0.316259	0.195122	0.057147	0.126134	7.97e-06	0.000174874	9.1422e-05
ILMN_1812940	TRMT1	-0.188735	-0.191284	-0.348525	-0.562477	0.029405	0.0287258	0.0290654	0.000196183	6.22e-08	9.81226e-05
ILMN_1659786	CCDC76	-0.131955	-0.0613854	-0.335176	-0.411111	0.107177	0.451991	0.279584	0.000186685	1.03e-05	9.84925e-05
ILMN_1705442	CMTM3	-0.0226087	0.157132	-0.825761	-0.307419	0.760984	0.0410273	0.401006	8.12e-14	0.000203628	0.000101814
ILMN_1669497	OSBPL10	-0.023981	0.0703184	-0.718319	-0.270448	0.713882	0.28955	0.501716	1.15e-13	0.000203756	0.000101878
ILMN_1712556	ZW10	-0.0766682	-0.154486	-0.269708	-0.360018	0.246812	0.0238475	0.13533	0.000217183	3.01e-06	0.000110096
ILMN_1671891	PID1	-0.126908	-0.0866593	-0.565768	-0.331185	0.120907	0.290054	0.20548	2.01e-08	0.000223391	0.000111706
ILMN_3196019	FAM60A	-0.160094	-0.109427	-0.340704	-0.316954	0.0383446	0.154771	0.0965576	6.04e-05	0.000163907	0.000112154
ILMN_1813544	OXCT1	-0.17512	-0.147848	-0.417848	-0.285816	0.015609	0.0409179	0.0282635	5.77e-07	0.00023446	0.000117519
ILMN_1784948	SPOCD1	0.0247784	-0.133529	-0.314357	-0.351624	0.744098	0.0866387	0.415368	0.000194634	4.44e-05	0.000119517
ILMN_1765109	TNFRSF25	-0.19268	-0.151799	-0.37913	-0.375822	0.0326886	0.0918664	0.0622775	0.000113018	0.000130673	0.000121845
ILMN_3229601	NA	-0.14097	-0.0818362	-0.347113	-0.298846	0.0587215	0.269811	0.164266	2.92e-05	0.000231169	0.000130184
ILMN_1692394	KIAA1024	0.0821544	0.0804795	-0.314962	-0.379416	0.291485	0.305569	0.298527	0.000241999	1.9e-05	0.0001305
ILMN_2230035	BBS2	-0.177165	-0.159664	-0.347574	-0.566995	0.0453125	0.0723989	0.0588557	0.000278231	9.09e-08	0.000139161
ILMN_1657373	LEPREL1	-0.00434156	0.0771299	-0.517891	-0.300059	0.953488	0.307498	0.630493	2.44e-08	0.000280884	0.000140454
ILMN_1694504	RNF220	-0.030003	-0.0672265	-0.281942	-0.334553	0.666795	0.341137	0.503966	0.00025796	2.6e-05	0.00014198
ILMN_2315979	LBH	-0.1256	-0.0940538	-0.301893	-0.480673	0.100909	0.220033	0.160471	0.000292338	1.65e-07	0.000146252
ILMN_1702899	PLEKHA7	0.156873	-0.0446228	-0.306255	-0.304366	0.0340565	0.53996	0.287008	0.000139479	0.000155562	0.000147521
ILMN_1732489	SLC10A7	-0.141606	-0.0138309	-0.29882	-0.375154	0.0624697	0.853863	0.458166	0.000285985	1.23e-05	0.000149143
ILMN_1725666	GTF2H3	-0.0677904	0.0626765	-0.528307	-0.273848	0.32385	0.365522	0.344686	2.03e-09	0.000299976	0.000149989
ILMN_1815385	SMAD9	-0.0710315	0.0116057	-0.33319	-0.406728	0.395962	0.890201	0.643082	0.000300673	2.05e-05	0.000160587
ILMN_2266948	SLC38A1	-0.0921097	0.0401165	-0.877799	-0.334449	0.27729	0.637126	0.457208	5.69e-13	0.000333691	0.000166846
ILMN_1797875	ALOX5AP	0.0940216	-0.032797	-0.295564	-0.349168	0.207666	0.660407	0.434036	0.000300372	3.35e-05	0.000166936
ILMN_1749583	ZNF777	-0.0390018	-0.17481	-0.295973	-0.415985	0.602184	0.0245663	0.313375	0.000335804	2.29e-06	0.000169047
ILMN_1668469	KIAA0922	0.0697087	0.13643	-0.293893	-0.342339	0.347718	0.0725969	0.210158	0.000318186	4.42e-05	0.000181193
ILMN_1662751	LOC645722	-0.112823	0.0883454	-0.365962	-0.299169	0.140375	0.250039	0.195207	2.21e-05	0.000345057	0.000183579
ILMN_1740737	DCPS	-0.0694008	-0.152557	-0.338377	-0.474758	0.422014	0.0846354	0.253325	0.000369254	2.73e-06	0.000185992
ILMN_1755352	TUB	0.124909	0.0854493	-0.402605	-0.351793	0.161916	0.339875	0.250895	5.39e-05	0.000320739	0.00018732
ILMN_1713732	ABL1	-0.132417	-0.131246	-0.43943	-0.349276	0.140736	0.1477	0.144218	1.57e-05	0.000371121	0.000193411
ILMN_3177532	CECR5-AS1	-0.0752082	-0.025644	-0.449335	-0.299499	0.327488	0.739414	0.533451	7.91e-07	0.000388229	0.00019451
ILMN_1655941	TMEM191A	0.190299	0.0830122	-0.273865	-0.545665	0.00924867	0.244514	0.126881	0.000396663	1.84e-09	0.000198332
ILMN_1743784	SHMT1	-0.132135	0.0247641	-0.329	-0.389055	0.119365	0.769156	0.444261	0.000363042	4.18e-05	0.000202421
ILMN_1706969	BEND6	-0.0424664	-0.0987367	-0.318452	-0.480138	0.603642	0.234829	0.419236	0.00040442	8.39e-07	0.000202629
ILMN_3239060	KRBA1	-0.0597125	-0.185725	-0.676692	-0.302672	0.44257	0.0214889	0.23203	8.9e-11	0.000407171	0.000203586
ILMN_1654772	NA	-0.17942	-0.120112	-0.424564	-0.33476	0.0422355	0.171743	0.106989	1.7e-05	0.000430463	0.000223731
ILMN_1745620	KRCC1	-0.146013	-0.0477679	-0.338419	-0.273695	0.043285	0.502781	0.273033	2.53e-05	0.000433826	0.000229563
ILMN_3237641	MUDENG	-0.0871806	-0.0197441	-0.27561	-0.64286	0.227576	0.784746	0.506161	0.000469921	4.48e-11	0.000234961
ILMN_1664910	RPSA	-0.107549	-0.158102	-0.285763	-0.341408	0.149287	0.0382272	0.0937573	0.000427539	4.42e-05	0.000235869
ILMN_1826566	NA	-0.0867526	-0.0248142	-0.382697	-0.333264	0.313622	0.773887	0.543754	7.12e-05	0.000420769	0.000245984
ILMN_1712751	HADHA	-0.122309	-0.105883	-0.256472	-0.310517	0.071996	0.120759	0.0963775	0.000470259	4.11e-05	0.000255679
ILMN_1769601	TBCK	-0.064952	0.0583999	-0.284562	-0.380328	0.386104	0.439483	0.412794	0.00051955	1.03e-05	0.000264925
ILMN_1763882	LOC388692	-0.145604	-0.00812626	-0.370789	-0.292399	0.0621218	0.91605	0.489086	2.17e-05	0.000513695	0.000267698
ILMN_1657064	C6orf70	-0.0990614	-0.113181	-0.299606	-0.267805	0.157086	0.110304	0.133695	0.000109717	0.000449765	0.000279741
ILMN_1812967	CNPY3	-0.0611971	0.0441148	-0.257262	-0.445306	0.370896	0.521643	0.44627	0.000574937	9.8e-08	0.000287517
ILMN_1657977	MSRB2	-0.0200605	-0.0224391	-0.263621	-0.379164	0.774082	0.750347	0.762215	0.000585222	3.6e-06	0.000294411
ILMN_1726989	C1orf86	-0.209713	-0.150608	-0.401271	-0.290354	0.00915189	0.0584058	0.0337788	7.16e-06	0.000618439	0.0003128
ILMN_1692020	PRSS16	0.067356	0.0358103	-0.349554	-0.681659	0.47157	0.703784	0.587677	0.000631267	8.32e-09	0.000315638
ILMN_2060115	SORL1	-0.0952471	0.0617279	-0.307505	-0.393793	0.24839	0.456303	0.352347	0.000614798	2.56e-05	0.000320199
ILMN_1762549	ORAOV1	-0.119923	-0.100915	-0.579806	-0.267008	0.0981252	0.165626	0.131875	5.77e-10	0.000652705	0.000326353
ILMN_1787762	HEATR1	-0.0121803	-0.161347	-0.298416	-0.40035	0.878617	0.0501708	0.464394	0.00064209	1.32e-05	0.000327645
ILMN_3239254	UCA1	-0.100046	-0.0929429	-0.312395	-0.317808	0.21445	0.252358	0.233404	0.000388569	0.00032632	0.000357445
ILMN_1680644	MIOS	0.0833676	-0.0476237	-0.247811	-0.244082	0.186584	0.451337	0.318961	0.000329954	0.000404482	0.000367218
ILMN_2354269	FAM164C	0.0174396	0.12413	-0.688799	-0.325434	0.842708	0.166424	0.504566	1.45e-09	0.000735798	0.0003679
ILMN_2204297	MUDENG	-0.0469329	-0.00789677	-0.265834	-0.524369	0.516468	0.913627	0.715048	0.000759527	9.5e-09	0.000379768
ILMN_2099249	MTERF	-0.135401	-0.0416716	-0.286489	-0.296292	0.0733232	0.57816	0.325742	0.000448527	0.000311255	0.000379891
ILMN_1668582	CRBN	-0.132969	-0.0657074	-0.301914	-0.44868	0.110299	0.428723	0.269511	0.000762555	3.11e-06	0.000382833
ILMN_1719753	VGLL1	0.204558	0.0930913	-0.360372	-0.321061	0.0204108	0.283032	0.151721	0.000153268	0.000621014	0.000387141
ILMN_1755321	AAAS	-0.081926	0.0387286	-0.379864	-0.278559	0.282769	0.612841	0.447805	1.29e-05	0.000792423	0.000402662
ILMN_1655245	MDM1	-0.0223822	-0.12039	-0.287662	-0.262525	0.748728	0.0930926	0.42091	0.000209693	0.000626073	0.000417883
ILMN_1756402	TMEM177	-0.051537	-0.113963	-0.357228	-0.241676	0.439631	0.094724	0.267177	4.08e-06	0.00089102	0.00044755
ILMN_1659752	AIDA	-0.120205	-0.233365	-0.325195	-0.387645	0.18128	0.0123582	0.0968191	0.000823443	0.000104341	0.000463892
ILMN_3241081	LOC100134361	-0.171784	-0.174378	-0.309233	-0.227288	0.00879679	0.00842667	0.00861173	1.75e-05	0.000944577	0.000481039
ILMN_3239181	ITPRIP	0.162513	-0.154729	-0.273854	-0.440611	0.0378231	0.0493918	0.0436075	0.000985613	1.15e-06	0.000493381
ILMN_1739001	TACSTD2	-0.0917358	0.0184799	-0.30787	-0.241745	0.174789	0.784179	0.479484	4.71e-05	0.000945559	0.000496329
ILMN_1692368	DLX2	0.0750653	0.0370757	-0.286448	-0.348827	0.346623	0.643641	0.495132	0.00093843	9.26e-05	0.000515515
ILMN_1805643	RILPL1	-0.00728093	-0.114927	-0.257968	-0.361067	0.919502	0.119298	0.5194	0.00102301	1.36e-05	0.000518304
ILMN_1766169	BCAT1	-0.0466594	-0.057303	-0.271388	-0.279749	0.520142	0.434299	0.47722	0.00062742	0.000458841	0.00054313
ILMN_1789616	NUPL2	0.083022	0.218957	-0.532779	-0.298793	0.325344	0.0128151	0.16908	1.75e-07	0.00110891	0.00055454
ILMN_1687556	DAPL1	-0.00298162	0.0466337	-0.466296	-0.28663	0.970473	0.566892	0.768682	1.08e-06	0.00111634	0.000558711
ILMN_3235326	LOC388796	0.0573329	0.019885	-0.27313	-0.301791	0.448528	0.793842	0.621185	0.000906164	0.000305263	0.000605713
ILMN_1655844	TAF1A	0.00335876	-0.0169439	-0.475691	-0.304326	0.968933	0.845641	0.907287	2.6e-06	0.00121388	0.000608238
ILMN_1742031	IFRD2	-0.0859516	-0.124476	-0.251261	-0.421935	0.233848	0.0903527	0.162101	0.00124997	7.98e-07	0.000625385
ILMN_1760201	DNMT1	-0.0103158	-0.146442	-0.400992	-0.254638	0.886688	0.0501919	0.46844	2.41e-06	0.00125229	0.000627351
ILMN_1706070	GLS2	-0.123348	0.144519	-0.35242	-0.327641	0.175552	0.117128	0.14634	0.00038759	0.000887195	0.000637393
ILMN_1720865	OSBPL7	-0.0558643	-0.091571	-0.27167	-0.342663	0.470236	0.243183	0.35671	0.00120723	8.04e-05	0.000643813
ILMN_1806463	CTAGE6P	0.0145036	-0.0718881	-0.407575	-0.271207	0.851321	0.359545	0.605433	5.78e-06	0.00129648	0.000651132
ILMN_2232494	C5orf42	-0.162112	-0.0673004	-0.345649	-0.284636	0.0496511	0.410149	0.2299	0.000126484	0.00121236	0.00066942
ILMN_2289775	HAX1	-0.144295	-0.11308	-0.347237	-0.260091	0.0579385	0.137426	0.0976823	3.91e-05	0.00133853	0.000688816
ILMN_1709604	SNORA64	-0.113833	-0.135054	-0.56416	-0.261504	0.134963	0.0803287	0.107646	4.13e-09	0.00138807	0.00069404
ILMN_1787280	C1orf135	0.0374807	-0.11793	-0.664293	-0.250946	0.603739	0.110477	0.357108	2.05e-11	0.00139042	0.000695212
ILMN_1670719	TPD52L1	-0.0612036	-0.0517727	-0.39623	-0.278713	0.446038	0.522466	0.484252	1.59e-05	0.00138362	0.000699758
ILMN_3245116	GOLIM4	-0.0245616	-0.00464742	-0.292967	-0.345182	0.768033	0.955867	0.86195	0.00121692	0.000198282	0.000707603
ILMN_1812968	SOX18	-0.01699	-0.221027	-0.49117	-0.281601	0.834048	0.00954368	0.421796	4.5e-07	0.00141938	0.000709916
ILMN_2306066	FUS	-0.0390018	-0.0813721	-0.340233	-0.219108	0.537359	0.205544	0.371452	3.87e-06	0.00142042	0.000712144
ILMN_1659937	ZBTB24	-0.0210068	-0.154064	-0.25311	-0.266642	0.764251	0.0338857	0.399068	0.00092629	0.000542069	0.000734179
ILMN_1872564	NA	0.0452175	-0.0446567	-0.300636	-0.329035	0.592274	0.600117	0.596195	0.00106471	0.000410036	0.000737372
ILMN_2353129	EYA2	0.0195098	0.0243216	-0.221989	-0.379101	0.761726	0.708014	0.73487	0.00147474	7.98e-07	0.00073777
ILMN_2367710	PKN1	0.0485724	-0.124588	-0.330817	-0.25435	0.508979	0.0978635	0.303421	6.34e-05	0.00144322	0.000753312
ILMN_1784535	ARMC10	0.0333578	0.0461538	-0.268495	-0.294554	0.659116	0.545651	0.602384	0.00110183	0.000414824	0.000758326
ILMN_1774265	C2orf82	-0.0399481	-0.0907565	-0.269907	-0.352613	0.609451	0.253071	0.431261	0.00145389	6.42e-05	0.000759044
ILMN_1689624	MINA	-0.151142	-0.147836	-0.233646	-0.465329	0.0311105	0.0363309	0.0337207	0.00157223	3.88e-08	0.000786135
ILMN_2309180	SMARCD3	0.0564832	-0.111998	-0.277277	-0.358199	0.484091	0.172688	0.32839	0.00150285	7.86e-05	0.000790727
ILMN_1709484	BLM	-0.0670849	-0.195647	-0.503893	-0.248897	0.357295	0.0102405	0.183768	2.5e-08	0.00158983	0.00079493
ILMN_1806907	PAWR	0.145412	0.0376597	-0.480263	-0.245382	0.0472491	0.602433	0.324841	5.37e-08	0.00160253	0.000801289
ILMN_3226505	MSL3	0.00602488	-0.166291	-0.255458	-0.335791	0.935425	0.0312464	0.483336	0.00154492	6.43e-05	0.000804611
ILMN_1736412	AMHR2	0.111411	-0.187924	-0.283287	-0.302309	0.165864	0.0231815	0.0945227	0.00107056	0.000549179	0.000809871
ILMN_1741475	C7orf47	0.0169763	-0.137805	-0.405006	-0.220454	0.792281	0.0389553	0.415618	2.15e-07	0.00164313	0.000821674
ILMN_2329744	PMS2	-0.0232787	0.0488585	-0.344626	-0.305693	0.789885	0.579932	0.684909	0.000351972	0.00131489	0.000833432
ILMN_2245676	BTF3	-0.148934	0.0308075	-0.295386	-0.281152	0.0639219	0.698325	0.381123	0.000622204	0.00107344	0.000847823
ILMN_1711270	SUGP2	-0.100645	-0.212645	-0.295012	-0.285262	0.209867	0.0108705	0.110369	0.0007028	0.0010246	0.000863701
ILMN_1669674	CNPY3	-0.177147	-0.030631	-0.29465	-0.558372	0.0469756	0.727423	0.387199	0.00177727	1.48e-07	0.000888707
ILMN_2388155	CASP3	0.0942069	-0.112072	-0.25244	-0.665716	0.213529	0.143921	0.178725	0.00188167	6.15e-11	0.000940833
ILMN_2120210	RCAN2	0.00403708	0.0404506	-0.293479	-0.416519	0.963044	0.64585	0.804447	0.00186442	2.82e-05	0.000946309
ILMN_1700461	AARSD1	-0.10244	-0.102425	-0.279051	-0.30595	0.206381	0.210434	0.208408	0.00137869	0.000538641	0.000958666
ILMN_1764970	JMJD1C	-0.106997	-0.135271	-0.220563	-0.382294	0.109216	0.0466212	0.0779187	0.00193893	1.04e-06	0.000969987
ILMN_1753286	MYO19	-0.141678	-0.185001	-0.388206	-0.266044	0.079766	0.0250809	0.0524234	1.91e-05	0.00198898	0.00100404
ILMN_2355042	CLUAP1	-0.117227	-0.0991344	-0.454492	-0.269631	0.151535	0.227641	0.189588	1.8e-06	0.00205711	0.00102945
ILMN_2081087	HSPA12A	0.0517916	0.00483084	-0.38058	-0.276926	0.532467	0.953872	0.74317	4.82e-05	0.00202749	0.00103785
ILMN_3310121	MIR629	0.081363	0.0620975	-0.239371	-0.379376	0.263649	0.396277	0.329963	0.0021685	6.32e-06	0.00108741
ILMN_1655225	C19orf25	0.017074	0.0140024	-0.238948	-0.31218	0.812485	0.847087	0.829786	0.00212601	0.000110835	0.00111842
ILMN_2317581	SHANK3	0.0301514	-0.121883	-0.248948	-0.283761	0.683274	0.107309	0.395291	0.00184476	0.000489453	0.00116711
ILMN_1773797	ANAPC1	0.160367	0.115448	-0.270189	-0.353741	0.0557922	0.167725	0.111759	0.00227903	0.000119187	0.00119911
ILMN_2361427	PMS2L3, ZNF12	-0.0256912	-0.0832394	-0.296118	-0.397746	0.775458	0.361893	0.568676	0.00232044	8.69e-05	0.00120367
ILMN_2155516	QTRTD1	-0.121866	0.00768781	-0.333839	-0.234655	0.0933816	0.915007	0.504194	3.78e-05	0.00238354	0.00121067
ILMN_1711909	EDEM2	-0.13228	-0.0633721	-0.226808	-0.305461	0.0607252	0.365234	0.21298	0.00234133	8.49e-05	0.00121312
ILMN_1908824	RNU6ATAC	-0.0882113	-0.0519816	-0.417302	-0.291907	0.324747	0.563681	0.444214	3.66e-05	0.00244275	0.00123967
ILMN_3235358	LOC100293748	-0.213479	-0.0707157	-0.263746	-0.456173	0.0114896	0.390149	0.200819	0.0025959	1.95e-06	0.00129892
ILMN_1789624	TPM2	-0.147383	-0.164405	-0.43564	-0.245888	0.0565838	0.0359254	0.0462546	1.17e-06	0.00261868	0.00130993
ILMN_2298860	HAGHL	-0.057286	-0.0709555	-0.435126	-0.245547	0.449583	0.354151	0.401867	1.17e-06	0.00262166	0.00131141
ILMN_3178406	KLHL29	-0.0603998	-0.147533	-0.274646	-0.288621	0.453578	0.0742194	0.263899	0.0016153	0.00100962	0.00131246
ILMN_1787919	PARVB	-0.0629686	-0.0481402	-0.377485	-0.25313	0.420154	0.54063	0.480392	2.17e-05	0.00261234	0.00131702
ILMN_1657058	PPIL6	0.0557731	-0.0288831	-0.246822	-0.252742	0.437043	0.689165	0.563104	0.00147408	0.00119301	0.00133355
ILMN_1781999	ABCF2	-0.0718683	-0.125641	-0.26807	-0.222509	0.290666	0.0708019	0.180734	0.000329737	0.00233902	0.00133438
ILMN_1796710	PHC1	0.149584	-0.0223464	-0.263336	-0.312637	0.0668679	0.781883	0.424376	0.00229403	0.00040254	0.00134828
ILMN_2103480	ZNF320	0.0151202	0.0486759	-0.316583	-0.223718	0.826297	0.484982	0.65564	4.85e-05	0.00265274	0.00135062
ILMN_3231621	NA	-0.107839	-0.154681	-0.250064	-0.629092	0.168872	0.0531501	0.111011	0.00274852	6.36e-10	0.00137426
ILMN_1674364	NA	0.110568	0.0651724	-0.272983	-0.256295	0.149304	0.395628	0.272466	0.000952281	0.00181602	0.00138415
ILMN_1776640	MPL	-0.16253	-0.0353235	-0.340175	-0.275482	0.0595762	0.678637	0.369107	0.000274245	0.00254137	0.00140781
ILMN_1735043	NA	-0.042835	-0.0597449	-0.331117	-0.285431	0.621606	0.495633	0.55862	0.000509847	0.00233957	0.00142471
ILMN_1748923	SMC2	-0.0904077	0.0395482	-0.411419	-0.260411	0.266961	0.628222	0.447592	1.02e-05	0.00284945	0.00142982
ILMN_3248758	NA	-0.143488	-0.180025	-0.428896	-0.280627	0.105425	0.0458936	0.0756594	1.76e-05	0.00287866	0.00144813
ILMN_1692352	IRAK4	0.0132613	-0.205302	-0.266595	-0.463093	0.873455	0.018207	0.445831	0.00294437	2.33e-06	0.00147335
ILMN_1763561	OSBPL6	-0.0939837	0.0519232	-0.435771	-0.323222	0.351438	0.608574	0.480006	0.000106013	0.00284988	0.00147794
ILMN_1771326	C15orf44	-0.0934919	0.0691844	-0.521834	-0.242199	0.220474	0.366827	0.293651	2.92e-08	0.00299407	0.00149705
ILMN_1654637	SETD5	-0.0168306	-0.0171757	-0.230334	-0.278211	0.812699	0.810601	0.81165	0.0026295	0.000393159	0.00151133
ILMN_3245458	SNORA61	0.0325903	-0.176829	-0.340285	-0.325041	0.735112	0.0742078	0.40466	0.00116568	0.00186048	0.00151308
ILMN_1696585	FERMT1	-0.128189	-0.0773978	-0.336455	-0.255996	0.113066	0.338288	0.225677	0.000152924	0.00291335	0.00153314
ILMN_1883239	NA	-0.0687765	-0.0911717	-0.280871	-0.278658	0.399562	0.269884	0.334723	0.00146162	0.00161283	0.00153723
ILMN_1734880	RPL23AP53	-0.172812	0.0294224	-0.315054	-0.235119	0.0227069	0.691669	0.357188	0.000125294	0.00301645	0.00157087
ILMN_2409642	TRO	-0.0373099	0.0767662	-0.242392	-0.241252	0.597286	0.283895	0.44059	0.00153357	0.00164016	0.00158687
ILMN_1803882	VEGFA	-0.0835325	-0.1709	-0.234332	-0.29167	0.255938	0.0244252	0.140182	0.0028665	0.000309979	0.00158824
ILMN_2408987	SMARCD3	0.179355	-0.0630823	-0.260337	-0.517649	0.0335087	0.447652	0.24058	0.00318844	2.09e-07	0.00159432
ILMN_1813911	HEXA	-0.0546812	-0.164033	-0.275143	-0.24764	0.470019	0.0359807	0.253	0.00084652	0.00241507	0.00163079
ILMN_1813938	CHCHD4	0.0774165	0.131511	-0.286694	-0.215642	0.256709	0.0596821	0.158195	0.000148378	0.00315393	0.00165115
ILMN_3238221	FLJ42627	-0.167826	0.0539222	-0.224523	-0.53998	0.0223861	0.454178	0.238282	0.00334549	3.41e-09	0.00167275
ILMN_2326675	NR2C1	-0.130444	-0.15647	-0.231696	-0.258516	0.0718029	0.0337061	0.0527545	0.00250015	0.000884498	0.00169232
ILMN_1668996	C1QBP	-0.115508	-0.132507	-0.389459	-0.222306	0.10683	0.0679703	0.0874002	2.53e-06	0.00342636	0.00171445
ILMN_1769517	PRKDC	0.231033	0.116783	-0.355776	-0.285484	0.0130324	0.200778	0.106905	0.000326086	0.00312809	0.00172709
ILMN_2413141	C6orf162	-0.0726803	-0.19302	-0.238752	-0.261657	0.322039	0.0117001	0.166869	0.00242979	0.00103021	0.00173
ILMN_1728059	NA	-0.22632	-0.0139066	-0.363354	-0.282057	0.0141593	0.876788	0.445473	0.000230532	0.003249	0.00173976
ILMN_3251212	RPL13AP3	-0.160242	-0.0116598	-0.241485	-0.282602	0.0381565	0.878004	0.45808	0.00289849	0.000635275	0.00176688
ILMN_1707169	AGMAT	-0.0789409	-0.201581	-0.253567	-0.316343	0.326758	0.0160132	0.171386	0.00322699	0.000354476	0.00179073
ILMN_1762224	HPS3	-0.035084	-0.0760923	-0.302843	-0.250834	0.655963	0.340359	0.498161	0.000468042	0.00311458	0.00179131
ILMN_1703754	CEP192	-0.127736	-0.143017	-0.264034	-0.225359	0.0752425	0.0493499	0.0622962	0.000628582	0.00302033	0.00182446
ILMN_1712634	TIA1	-0.183897	-0.0720386	-0.459342	-0.243249	0.0220019	0.360817	0.191409	7.3e-07	0.00365782	0.00182928
ILMN_2346479	HOMER2	0.0536464	-0.161226	-0.211979	-0.369907	0.431179	0.0226502	0.226915	0.0036568	3.37e-06	0.00183008
ILMN_1661653	DET1	-0.0699273	-0.15213	-0.217586	-0.340398	0.318747	0.0353223	0.177035	0.00366615	2.04e-05	0.00184327
ILMN_2402947	USP14	-0.159261	-0.105058	-0.472952	-0.218228	0.027177	0.141897	0.0845371	4.62e-08	0.00375612	0.00187808
ILMN_1796339	PLEKHA2	-0.0972868	-0.12526	-0.246657	-0.232558	0.174841	0.0855203	0.130181	0.00136647	0.00242885	0.00189766
ILMN_1683969	FKBP1A	0.12735	0.00383056	-0.224988	-0.247889	0.0726625	0.956473	0.514568	0.00269678	0.00109919	0.00189798
ILMN_3249059	SNHG12	-0.204976	-0.227811	-0.40914	-0.286602	0.0303088	0.0176902	0.0239995	7.63e-05	0.00377473	0.00192552
ILMN_1786278	FAM149A	0.0800798	-0.0108932	-0.268269	-0.337656	0.351858	0.899597	0.625727	0.0035294	0.000361535	0.00194547
ILMN_1761138	C9orf142	-0.0175955	-0.141408	-0.293595	-0.206023	0.790436	0.0391341	0.414785	7.97e-05	0.00382181	0.00195076
ILMN_3238048	NA	-0.0958878	-0.115593	-0.195689	-0.411498	0.13545	0.0761184	0.105784	0.00399991	1.14e-07	0.00200001
ILMN_1811593	NIPAL1	0.0928238	0.0972689	-0.291336	-0.285788	0.285912	0.267998	0.276955	0.00184163	0.0022471	0.00204436
ILMN_2066667	RRP8	-0.0360315	-0.107786	-0.208896	-0.231037	0.581437	0.107051	0.344244	0.00294672	0.00117127	0.00205899
ILMN_1662905	NME1, NME2	0.0496422	-0.0939813	-0.203227	-0.250188	0.447081	0.157318	0.3022	0.0036443	0.00048711	0.00206571
ILMN_2234956	LEPR	-0.163221	0.195394	-0.385532	-0.296165	0.0924177	0.0473695	0.0698936	0.000262639	0.00388248	0.00207256
ILMN_1760933	PEX10	-0.0949991	-0.0106862	-0.467393	-0.229374	0.206539	0.88693	0.546735	2.22e-07	0.00417452	0.00208737
ILMN_1765212	LARP1B	0.148318	0.0848652	-0.276063	-0.289767	0.0858039	0.324041	0.204922	0.00254205	0.00165934	0.00210069
ILMN_2327974	CORO2A	-0.04359	-0.196816	-0.349664	-0.25295	0.5955	0.021274	0.308387	0.000134424	0.00410642	0.00212042
ILMN_1776464	PARP4	-0.0854759	0.191599	-0.382835	-0.217218	0.231601	0.010074	0.120837	3.72e-06	0.00432183	0.00216278
ILMN_3242156	KIR3DS1	-0.0443355	0.0840936	-0.386811	-0.266977	0.610623	0.340386	0.475504	7.65e-05	0.00427293	0.00217471
ILMN_2280911	VPS41	-0.0751353	-0.218231	-0.24731	-0.33288	0.353011	0.00990083	0.181456	0.00416977	0.000204806	0.00218729
ILMN_1733174	LOC100132057	0.0886092	0.0106379	-0.330009	-0.31019	0.359275	0.9127	0.635987	0.00156078	0.00281834	0.00218956
ILMN_3244434	ARAP2	-0.134145	-0.100372	-0.261808	-0.481535	0.123749	0.250616	0.187182	0.00445847	2.03e-06	0.00223025
ILMN_2370208	CMTM3	0.0184328	-0.0303543	-0.248639	-0.22507	0.795086	0.671868	0.733477	0.0012709	0.00325643	0.00226367
ILMN_1658351	FIS1	0.0391334	-0.0037648	-0.336876	-0.20452	0.560296	0.955624	0.75796	1.26e-05	0.00451742	0.00226501
ILMN_1808356	FAM3A	-0.170594	0.0453536	-0.301036	-0.202999	0.0134938	0.500239	0.256866	6.01e-05	0.00448438	0.00227224
ILMN_1709740	TXNDC16	-0.0959505	-0.0641226	-0.327844	-0.290908	0.303052	0.493576	0.398314	0.00114327	0.00352651	0.00233489
ILMN_1711227	GMDS	-0.136532	0.0965451	-0.247753	-0.345653	0.0995112	0.244371	0.171941	0.00456324	0.000149647	0.00235645
ILMN_3249419	NA	-0.075144	0.191253	-0.337829	-0.240275	0.344125	0.020288	0.182206	0.000130121	0.00461953	0.00237483
ILMN_2191634	RPL37	-0.123854	-0.12769	-0.239036	-0.270905	0.111664	0.104302	0.107983	0.00369674	0.00119653	0.00244664
ILMN_2340347	PC	-0.0576265	-0.0221542	-0.325528	-0.244082	0.474647	0.784749	0.629698	0.000257382	0.00466824	0.00246281
ILMN_3246353	SNORD65	-0.0330293	-0.156585	-0.269093	-0.357109	0.710774	0.0867818	0.398778	0.00475752	0.000296987	0.00252725
ILMN_1714586	VGLL3	-0.0363094	0.0615383	-0.262007	-0.260572	0.650788	0.448065	0.549426	0.00244373	0.00261943	0.00253158
ILMN_3288783	NA	-0.0987775	-0.208464	-0.250958	-0.305524	0.233191	0.0152837	0.124237	0.00437272	0.000702493	0.0025376
ILMN_1791884	SNHG11	0.0516728	-0.0817045	-0.347948	-0.198569	0.436886	0.225539	0.331213	6.04e-06	0.00517281	0.00258942
ILMN_1676846	ABCE1	-0.0547476	-0.0604476	-0.245532	-0.282177	0.492798	0.453188	0.472993	0.00404274	0.00115885	0.00260079
ILMN_1672102	PTPRB	-0.0417501	0.0391178	-0.268845	-0.279178	0.620361	0.645463	0.632912	0.00300838	0.00219359	0.00260098
ILMN_1786834	PRKX	-0.0222096	-0.0930433	-0.266219	-0.255116	0.781952	0.254036	0.517994	0.00213695	0.00318438	0.00266066
ILMN_3251455	RHOQ	-0.162309	-0.0201473	-0.24726	-0.210129	0.0220515	0.77122	0.396636	0.000961463	0.00438219	0.00267182
ILMN_1668924	BEGAIN	-0.0961347	0.0905014	-0.27668	-0.239385	0.221935	0.2539	0.237918	0.00112518	0.00429238	0.00270878
ILMN_3235003	LOC100130000	-0.145508	0.117208	-0.307969	-0.538438	0.165508	0.266217	0.215862	0.00547956	7.65e-06	0.0027436
ILMN_2369953	ARL4A	0.0498946	0.000588844	-0.32341	-0.23163	0.521606	0.994004	0.757805	0.000182963	0.00539534	0.00278915
ILMN_1666713	LYPLA1	-0.122417	-0.0764154	-0.375159	-0.23311	0.124729	0.337946	0.231337	2.78e-05	0.0056353	0.00283155
ILMN_2078334	CNOT10	-0.162179	0.0608729	-0.303122	-0.219532	0.0325092	0.415183	0.223846	0.000215389	0.00547617	0.00284578
ILMN_3247723	NOP16	0.168756	-0.0640076	-0.208566	-0.508612	0.0208684	0.371728	0.196298	0.0057572	1.19e-08	0.00287861
ILMN_1662964	PRMT3	-0.152326	-0.119803	-0.778965	-0.199064	0.0280604	0.083341	0.0557007	2.31e-14	0.00576789	0.00288394
ILMN_1770690	CDKL3	0.0379717	0.186947	-0.3255	-0.22445	0.616661	0.0181096	0.317385	0.000121978	0.00567248	0.00289723
ILMN_2057981	FAM164A	-0.1551	-0.0400474	-0.217601	-0.276801	0.038209	0.586688	0.312448	0.00525604	0.000559212	0.00290763
ILMN_1658743	CCNDBP1	-0.164695	-0.131343	-0.224376	-0.268658	0.0316145	0.0860734	0.058844	0.00489657	0.000971006	0.00293379
ILMN_1799015	PXMP2	-0.145549	0.0307635	-0.309451	-0.216933	0.052595	0.67808	0.365338	0.000155884	0.00577828	0.00296708
ILMN_1661673	MATR3	-0.0407205	-0.141282	-0.218177	-0.418717	0.584651	0.0651772	0.324914	0.00601967	1.87e-06	0.00301077
ILMN_1793543	C1orf51	0.157298	-0.0358383	-0.201566	-0.420393	0.0268877	0.607074	0.316981	0.00619462	4.16e-07	0.00309752
ILMN_1735877	EFEMP1	-0.0253671	-0.112391	-0.211302	-0.279196	0.723467	0.125364	0.424415	0.00578026	0.000418016	0.00309914
ILMN_1795344	GOLIM4	0.0770303	0.0120414	-0.267768	-0.223729	0.305252	0.873007	0.58913	0.0010056	0.00519677	0.00310119
ILMN_3307836	SLC5A12	0.0333953	0.0484036	-0.237659	-0.345529	0.681018	0.555279	0.618148	0.00610761	0.000141983	0.00312479
ILMN_1733175	C9orf51	-0.153654	-0.0844931	-0.271564	-0.248771	0.0634813	0.304688	0.184085	0.00196107	0.00429672	0.00312889
ILMN_1658579	CDK5RAP3	-0.287973	0.118046	-0.424339	-0.316062	0.0100193	0.279129	0.144574	0.000344517	0.00595544	0.00314998
ILMN_1802157	THOC1	-0.160121	-0.00563476	-0.600202	-0.211159	0.0316571	0.938541	0.485099	3.55e-10	0.00642702	0.00321351
ILMN_1726752	APTX	0.0556039	-0.189812	-0.224434	-0.233539	0.442682	0.0121702	0.227426	0.00378182	0.00274161	0.00326172
ILMN_1783097	LOC100130000	0.0389924	-0.0230818	-0.227923	-0.266649	0.610974	0.765132	0.688053	0.00536359	0.00137752	0.00337056
ILMN_1690576	BAT1	-0.189768	-0.213094	-0.319047	-0.230769	0.0209296	0.0107358	0.0158327	0.000289139	0.00665098	0.00347006
ILMN_2205050	PRKX	-0.0486767	0.00837726	-0.224817	-0.337509	0.533486	0.91522	0.724353	0.0068754	0.000114637	0.00349502
ILMN_1810531	DRG2	0.0789008	-0.194279	-0.269273	-0.226965	0.307156	0.015563	0.161359	0.00126075	0.00577825	0.0035195
ILMN_1767892	DUSP12	0.0691029	-0.0436575	-0.263182	-0.230026	0.374081	0.576713	0.475397	0.00169873	0.0055318	0.00361526
ILMN_1900513	NA	-0.22003	-0.16293	-0.449875	-0.243881	0.0128467	0.0632574	0.0380521	5.47e-06	0.00731337	0.00365942
ILMN_1767367	NA	0.196234	0.165922	-0.229022	-0.240094	0.0118101	0.032877	0.0223436	0.00436547	0.0029919	0.00367869
ILMN_1738912	NA	0.0646539	-0.0199415	-0.263954	-0.262824	0.444901	0.814762	0.629832	0.00358142	0.00378402	0.00368272
ILMN_1730007	MPZL2	-0.174453	-0.22183	-0.262668	-0.2583	0.0415391	0.011323	0.0264311	0.00340929	0.00399904	0.00370417
ILMN_2077680	CLDND2	-0.0964809	-0.11213	-0.218665	-0.367694	0.212504	0.15224	0.182372	0.00743141	2.68e-05	0.00372911
ILMN_1768576	LOC387723	-0.102794	-0.0184761	-0.293219	-0.363089	0.311404	0.856034	0.583719	0.00647973	0.000996907	0.00373832
ILMN_1658569	LGALS7	-0.0447954	0.0179954	-0.297698	-0.267794	0.61823	0.842517	0.730373	0.00214982	0.00537902	0.00376442
ILMN_1778187	TARS2	-0.14549	-0.105827	-0.228881	-0.219297	0.0481404	0.149638	0.098889	0.00309127	0.00450495	0.00379811
ILMN_1795524	C15orf44	-0.166916	-0.094828	-0.336714	-0.196946	0.0197042	0.179289	0.0994966	2.09e-05	0.00769501	0.00385796
ILMN_1815718	BTRC	-0.124481	0.00888672	-0.230349	-0.228938	0.0983543	0.905339	0.501847	0.00377504	0.0040481	0.00391157
ILMN_3301698	LOC731282	-0.012612	-0.048958	-0.264871	-0.273544	0.885097	0.578892	0.731994	0.00461196	0.00360463	0.00410829
ILMN_1343539	NA	0.107615	0.084098	-0.255399	-0.238948	0.183453	0.300808	0.242131	0.00303376	0.00535086	0.00419231
ILMN_3239263	RPL23AP53	-0.178299	0.0411881	-0.278911	-0.225236	0.0275901	0.603851	0.315721	0.00111414	0.00727075	0.00419245
ILMN_1691402	NA	-0.148438	-0.0361855	-0.325032	-0.229665	0.0734074	0.659479	0.366443	0.000301694	0.00810591	0.0042038
ILMN_1765684	C19orf70	0.151373	-0.0899082	-0.185973	-0.250149	0.0255395	0.179986	0.102763	0.00788829	0.000547037	0.00421766
ILMN_1784467	NUP210	0.125718	-0.116469	-0.210584	-0.339716	0.0994759	0.129395	0.114436	0.00837506	6.22e-05	0.00421863
ILMN_1749676	KIAA1704	-0.078595	0.0141917	-0.272293	-0.229986	0.326007	0.859681	0.592844	0.00160032	0.00684414	0.00422223
ILMN_1683447	RPL35	-0.0333965	-0.00530428	-0.233411	-0.190893	0.6167	0.937105	0.776903	0.0012747	0.00731228	0.00429349
ILMN_3236942	SNORA5A	0.02385	0.0102278	-0.218374	-0.229847	0.743911	0.889513	0.816712	0.00515684	0.00345673	0.00430678
ILMN_1869243	KCNC1	-0.0527068	0.0360069	-0.302267	-0.215289	0.491921	0.641179	0.56655	0.00034548	0.00831021	0.00432785
ILMN_1667715	LOC100506380	-0.00171841	0.0119084	-0.263707	-0.291205	0.984734	0.895457	0.940096	0.00598418	0.002693	0.00433859
ILMN_1692398	CNTNAP1	-0.147641	0.0617481	-0.265776	-0.254114	0.0878236	0.472706	0.280265	0.00359718	0.00527712	0.00443715
ILMN_1764314	FGD1	-0.0981476	0.00940901	-0.254006	-0.239376	0.227609	0.907926	0.567768	0.0033888	0.0055908	0.0044898
ILMN_3276395	LOC100653166	-0.217325	-0.172506	-0.270146	-0.250839	0.014183	0.050468	0.0323255	0.00326522	0.00606031	0.00466276
ILMN_1810891	ZNF629	-0.0526508	-0.0704102	-0.218509	-0.277133	0.499406	0.371676	0.435541	0.00826747	0.00109522	0.00468134
ILMN_1729514	CMTM4	0.0455161	-0.0751139	-0.217649	-0.247562	0.547834	0.327378	0.437606	0.0069204	0.00245624	0.00468832
ILMN_1813277	SUPT3H	-0.0584498	0.116046	-0.259307	-0.246225	0.483405	0.171491	0.327448	0.00369351	0.00570643	0.00469997
ILMN_2068991	LOC653380	-0.0105138	-0.0803721	-0.255146	-0.210204	0.88767	0.287809	0.58774	0.00157647	0.00811973	0.0048481
ILMN_1733441	POGZ	-0.0353007	-0.0468445	-0.237716	-0.199208	0.616596	0.510689	0.563643	0.00182098	0.00801031	0.00491565
ILMN_2386269	U2AF1L4	-0.0958623	-0.0227579	-0.245591	-0.287319	0.271677	0.79452	0.533098	0.00773496	0.00218287	0.00495891
ILMN_1768101	HOXB6	-0.0628553	-0.0156487	-0.216013	-0.207008	0.375665	0.826195	0.60093	0.00432816	0.00616199	0.00524508
ILMN_1859787	NA	-0.0248169	-0.0531824	-0.232261	-0.236578	0.752426	0.503782	0.628104	0.00571351	0.00503593	0.00537472
ILMN_2359710	PTP4A3	0.168297	-0.0464122	-0.240071	-0.212725	0.0301952	0.542875	0.286535	0.00310503	0.00820605	0.00565554
ILMN_1733690	AKAP7	0.180635	-0.0442061	-0.23687	-0.235484	0.028227	0.584227	0.306227	0.00556696	0.00592806	0.00574751
ILMN_1792990	ZNF202	0.0248329	0.097085	-0.247293	-0.25148	0.769038	0.258691	0.513865	0.00615264	0.00550213	0.00582739
ILMN_1719938	FGF11	-0.04029	-0.0558576	-0.223641	-0.234577	0.604891	0.477779	0.541335	0.00698683	0.00492686	0.00595685
ILMN_1782761	ARHGAP20	-0.0955118	-0.119546	-0.245626	-0.251459	0.262989	0.166684	0.214836	0.00656233	0.00558148	0.0060719
ILMN_1676555	TTC26	-0.0882487	0.0299032	-0.190187	-0.179695	0.165249	0.637701	0.401475	0.00472676	0.00743125	0.006079
ILMN_1807613	GPR34	-0.0316233	0.0531923	-0.240636	-0.232754	0.696094	0.515635	0.605865	0.00540758	0.00708747	0.00624753
ILMN_1761247	PIR	0.148806	-0.0376625	-0.226084	-0.237858	0.0675691	0.640207	0.353888	0.00777882	0.00539859	0.0065887
ILMN_1746434	KRTAP4-3	0.0973115	0.0599692	-0.251062	-0.251686	0.26639	0.495214	0.380802	0.0067622	0.00675165	0.00675693
ILMN_1774335	FLJ45831	0.0305522	-0.0441446	-0.198781	-0.209754	0.664988	0.535666	0.600327	0.00806444	0.00548456	0.0067745
ILMN_2399827	HSF4	-0.0116628	-0.060152	-0.201996	-0.203397	0.868598	0.399698	0.634148	0.0071824	0.00693982	0.00706111

## Sheet: siATF2.MvsT DownR Pathway Enric
STRING pathway enrichment analysis of genes upregulated in TAMRs after ATF2 silencing_KEGG
#term ID	term description	observed gene count	background gene count	false discovery rate	matching proteins in your network (IDs)	matching proteins in your network (labels)
hsa03010	Ribosome	10	130	0.0381	ENSP00000259469,ENSP00000270625,ENSP00000274242,ENSP00000346067,ENSP00000359345,ENSP00000363676,ENSP00000385958,ENSP00000389103,ENSP00000393241,ENSP00000470972	RPL11,RPL23A,RPL35,RPL37,RPL5,RPS11,RPS14,RPS18,RPS19,RPSA
STRING pathway enrichment analysis of genes upregulated in TAMRs after ATF2 silencing_REACTOME
#term ID	term description	observed gene count	background gene count	false discovery rate	matching proteins in your network (IDs)	matching proteins in your network (labels)
HSA-168273	Influenza Viral RNA Transcription and Replication	13	128	0.00095	ENSP00000209873,ENSP00000254508,ENSP00000258742,ENSP00000259469,ENSP00000270625,ENSP00000274242,ENSP00000346067,ENSP00000359345,ENSP00000363676,ENSP00000385958,ENSP00000389103,ENSP00000393241,ENSP00000470972	AAAS,NUP210,NUPL2,RPL11,RPL23A,RPL35,RPL37,RPL5,RPS11,RPS14,RPS18,RPS19,RPSA
HSA-156902	Peptide chain elongation	10	86	0.0014	ENSP00000259469,ENSP00000270625,ENSP00000274242,ENSP00000346067,ENSP00000359345,ENSP00000363676,ENSP00000385958,ENSP00000389103,ENSP00000393241,ENSP00000470972	RPL11,RPL23A,RPL35,RPL37,RPL5,RPS11,RPS14,RPS18,RPS19,RPSA
HSA-1799339	SRP-dependent cotranslational protein targeting to membrane	11	109	0.0014	ENSP00000259469,ENSP00000262213,ENSP00000270625,ENSP00000274242,ENSP00000346067,ENSP00000359345,ENSP00000363676,ENSP00000385958,ENSP00000389103,ENSP00000393241,ENSP00000470972	RPL11,RPL23A,RPL35,RPL37,RPL5,RPS11,RPS14,RPS18,RPS19,RPSA,TRAM1
HSA-192823	Viral mRNA Translation	10	86	0.0014	ENSP00000259469,ENSP00000270625,ENSP00000274242,ENSP00000346067,ENSP00000359345,ENSP00000363676,ENSP00000385958,ENSP00000389103,ENSP00000393241,ENSP00000470972	RPL11,RPL23A,RPL35,RPL37,RPL5,RPS11,RPS14,RPS18,RPS19,RPSA
HSA-2408557	Selenocysteine synthesis	10	90	0.0014	ENSP00000259469,ENSP00000270625,ENSP00000274242,ENSP00000346067,ENSP00000359345,ENSP00000363676,ENSP00000385958,ENSP00000389103,ENSP00000393241,ENSP00000470972	RPL11,RPL23A,RPL35,RPL37,RPL5,RPS11,RPS14,RPS18,RPS19,RPSA
HSA-6791226	Major pathway of rRNA processing in the nucleolus and cytosol	14	179	0.0014	ENSP00000259469,ENSP00000270625,ENSP00000274242,ENSP00000341874,ENSP00000346067,ENSP00000355541,ENSP00000359345,ENSP00000363676,ENSP00000363944,ENSP00000369391,ENSP00000385958,ENSP00000389103,ENSP00000393241,ENSP00000470972	HEATR1,LAS1L,RIOK3,RPL11,RPL23A,RPL35,RPL37,RPL5,RPP40,RPS11,RPS14,RPS18,RPS19,RPSA
HSA-72689	Formation of a pool of free 40S subunits	10	98	0.0014	ENSP00000259469,ENSP00000270625,ENSP00000274242,ENSP00000346067,ENSP00000359345,ENSP00000363676,ENSP00000385958,ENSP00000389103,ENSP00000393241,ENSP00000470972	RPL11,RPL23A,RPL35,RPL37,RPL5,RPS11,RPS14,RPS18,RPS19,RPSA
HSA-72764	Eukaryotic Translation Termination	10	90	0.0014	ENSP00000259469,ENSP00000270625,ENSP00000274242,ENSP00000346067,ENSP00000359345,ENSP00000363676,ENSP00000385958,ENSP00000389103,ENSP00000393241,ENSP00000470972	RPL11,RPL23A,RPL35,RPL37,RPL5,RPS11,RPS14,RPS18,RPS19,RPSA
HSA-975956	Nonsense Mediated Decay (NMD) independent of the Exon Junction Complex (EJC)	10	92	0.0014	ENSP00000259469,ENSP00000270625,ENSP00000274242,ENSP00000346067,ENSP00000359345,ENSP00000363676,ENSP00000385958,ENSP00000389103,ENSP00000393241,ENSP00000470972	RPL11,RPL23A,RPL35,RPL37,RPL5,RPS11,RPS14,RPS18,RPS19,RPSA
HSA-8953854	Metabolism of RNA	28	652	0.0015	ENSP00000209873,ENSP00000254108,ENSP00000254508,ENSP00000258742,ENSP00000259469,ENSP00000261600,ENSP00000263579,ENSP00000270625,ENSP00000274242,ENSP00000327459,ENSP00000341874,ENSP00000346067,ENSP00000349923,ENSP00000355541,ENSP00000359160,ENSP00000359345,ENSP00000363676,ENSP00000363944,ENSP00000369391,ENSP00000385958,ENSP00000389103,ENSP00000392257,ENSP00000393241,ENSP00000399862,ENSP00000420682…	AAAS,APOBEC3B,CNOT10,DCPS,FUS,GTF2H3,HEATR1,LAGE3,LAS1L,NUP210,NUPL2,PPIL6,QTRTD1,RIOK3,RPL11,RPL23A,RPL35,RPL37,RPL5,RPP40,RPS11,RPS14,RPS18,RPS19,RPSA,THOC1,TRMT1,TRMT13
HSA-156827	L13a-mediated translational silencing of Ceruloplasmin expression	10	107	0.0019	ENSP00000259469,ENSP00000270625,ENSP00000274242,ENSP00000346067,ENSP00000359345,ENSP00000363676,ENSP00000385958,ENSP00000389103,ENSP00000393241,ENSP00000470972	RPL11,RPL23A,RPL35,RPL37,RPL5,RPS11,RPS14,RPS18,RPS19,RPSA
HSA-72706	GTP hydrolysis and joining of the 60S ribosomal subunit	10	108	0.0019	ENSP00000259469,ENSP00000270625,ENSP00000274242,ENSP00000346067,ENSP00000359345,ENSP00000363676,ENSP00000385958,ENSP00000389103,ENSP00000393241,ENSP00000470972	RPL11,RPL23A,RPL35,RPL37,RPL5,RPS11,RPS14,RPS18,RPS19,RPSA
HSA-975957	Nonsense Mediated Decay (NMD) enhanced by the Exon Junction Complex (EJC)	10	112	0.0024	ENSP00000259469,ENSP00000270625,ENSP00000274242,ENSP00000346067,ENSP00000359345,ENSP00000363676,ENSP00000385958,ENSP00000389103,ENSP00000393241,ENSP00000470972	RPL11,RPL23A,RPL35,RPL37,RPL5,RPS11,RPS14,RPS18,RPS19,RPSA
HSA-9010553	Regulation of expression of SLITs and ROBOs	11	164	0.009	ENSP00000230658,ENSP00000259469,ENSP00000270625,ENSP00000274242,ENSP00000346067,ENSP00000359345,ENSP00000363676,ENSP00000385958,ENSP00000389103,ENSP00000393241,ENSP00000470972	ISL1,RPL11,RPL23A,RPL35,RPL37,RPL5,RPS11,RPS14,RPS18,RPS19,RPSA
HSA-77346	Beta oxidation of decanoyl-CoA to octanoyl-CoA-CoA	3	6	0.0127	ENSP00000263702,ENSP00000325136,ENSP00000370023	HADHA,HADHB,MECR
HSA-376176	Signaling by ROBO receptors	12	210	0.0174	ENSP00000230658,ENSP00000259469,ENSP00000270625,ENSP00000274242,ENSP00000346067,ENSP00000359345,ENSP00000361423,ENSP00000363676,ENSP00000385958,ENSP00000389103,ENSP00000393241,ENSP00000470972	ABL1,ISL1,RPL11,RPL23A,RPL35,RPL37,RPL5,RPS11,RPS14,RPS18,RPS19,RPSA
HSA-72306	tRNA processing	8	103	0.0218	ENSP00000209873,ENSP00000254508,ENSP00000258742,ENSP00000349923,ENSP00000359160,ENSP00000369391,ENSP00000420682,ENSP00000466967	AAAS,LAGE3,NUP210,NUPL2,QTRTD1,RPP40,TRMT1,TRMT13
HSA-71291	Metabolism of amino acids and derivatives	16	354	0.025	ENSP00000259469,ENSP00000270625,ENSP00000274242,ENSP00000310447,ENSP00000318868,ENSP00000321271,ENSP00000346067,ENSP00000359345,ENSP00000363676,ENSP00000364986,ENSP00000377040,ENSP00000385958,ENSP00000389103,ENSP00000393241,ENSP00000443459,ENSP00000470972	AASS,AGMAT,BCAT1,GLS2,PXMP2,RPL11,RPL23A,RPL35,RPL37,RPL5,RPS11,RPS14,RPS18,RPS19,RPSA,SHMT1
HSA-5663205	Infectious disease	16	363	0.031	ENSP00000209873,ENSP00000254508,ENSP00000258742,ENSP00000259469,ENSP00000270625,ENSP00000274242,ENSP00000346067,ENSP00000359206,ENSP00000359345,ENSP00000360671,ENSP00000363676,ENSP00000385958,ENSP00000389103,ENSP00000393241,ENSP00000445162,ENSP00000470972	AAAS,BTRC,GTF2H3,NUP210,NUPL2,RPL11,RPL23A,RPL35,RPL37,RPL5,RPS11,RPS14,RPS18,RPS19,RPSA,SLC25A5
